# Supplementary material
Source: ML conference proceedings conference paper supplement (https://openreview.net/forum?id=am86qcwErJm)
Supplement: supplementary_material [file attachment]

## A Data collection and annotation methodology

This section outlines the search methodology and data recording practices used to collect the dataset of algorithm performance and evaluation methodologies for the field of cooperative MARL.<sup>1</sup> The dataset used in the main body of this paper reflects the algorithm evaluation practices of published cooperative MARL papers only. We note that the original data collection was not restricted to accepted publications and cooperative MARL, as it instead attempts to incorporate all prominent and contemporary deep MARL algorithms and approaches from all available studies. This is reflected in this appendix, where we refer to data collected from all recorded papers (published, rejected, unknown, and non-cooperative) as *all papers*. Similarly, we refer to the data collected from cooperative published papers (which were used in the main body of this work) as *the main papers*. The non-published papers and non-cooperative published papers are referred to as *the other papers*.

### A.1 Paper search strategy

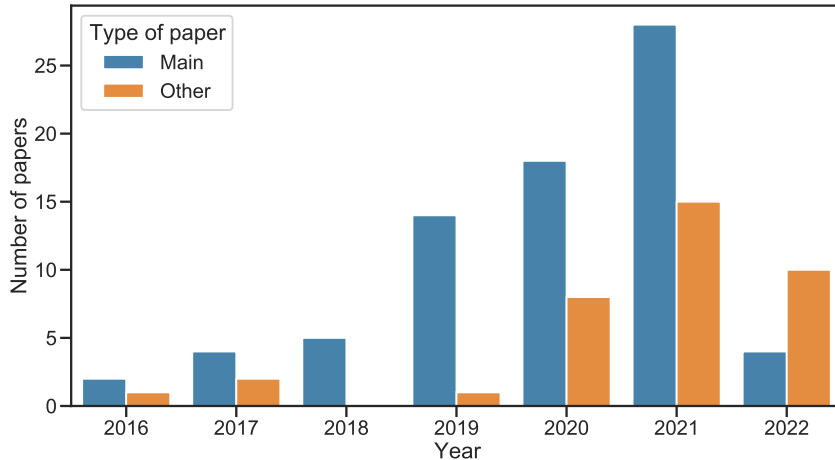

Figure 1: Recorded papers by year

In order to gather data on MARL algorithm performance evaluation, we gathered relevant MARL research papers which were published between the years 2016 and 2022. To identify relevant studies, searched for relevant research key terms, such as “Multi-agent RL”, “MARL evaluation” and “Benchmarking MARL”. We searched the arXiv website for these terms in different combinations of the title, abstract and keywords. Additionally, several papers were included from the reference list of other papers. Although we do not claim to have a dataset comprised of all modern deep MARL algorithms, we strive to collect data on at least all of the most widely used deep MARL algorithms. To our knowledge, all major deep MARL algorithms are represented in our dataset and this dataset is the first of its kind. The search queries were finalized on the 8th of April 2022. The published research papers that we recorded can be found in Table 1, where these were published at various conferences including ICML, NeurIPS, ICLR, and others.

### A.2 Filtering data to find relevant studies

Following the initial data collection, the dataset was refined to ensure relevance using the following criteria:

- The papers must be either peer review conference or journal papers, and published in the English language.
- Papers were restricted to only those which focus exclusively on the cooperative MARL case.

<sup>1</sup>Meta-analysis dataset on MARL evaluation <https://bit.ly/3Lp4pHx>

Table 1: Published cooperative MARL research papers collected and manually annotated for data analysis of algorithm performance evaluation methods.

| Title                                                                                                                        | Authors                          | Conference |
|------------------------------------------------------------------------------------------------------------------------------|----------------------------------|------------|
| Learning Multiagent Communication with Backpropagation                                                                       | Sukhbaatar et al. (2016)         | NeurIPS    |
| Learning to Communication in Deep Multi-Agent Reinforcement Learning                                                         | Foerster et al. (2016)           | NeurIPS    |
| Deep Decentralized Multi-task Multi-Agent Reinforcement Learning under Partial Observability                                 | Omidshafiei et al. (2017)        | ICML       |
| Multi-Agent Actor-Critic for Mixed Cooperative-Competitive Environments                                                      | Lowe et al. (2017)               | NeurIPS    |
| Stabilising Experience Replay for Deep Multi-Agent Reinforcement Learning                                                    | Foerster et al. (2017)           | ICML       |
| MultiAgent Soft-Q Learning                                                                                                   | Wei et al. (2018)                | AAAI       |
| Counterfactual Multi-Agent Policy Gradients                                                                                  | Foerster et al. (2018)           | AAAI       |
| Value-Decomposition Networks For Cooperative Multi-Agent Learning Based On Team Reward                                       | Sunehag et al. (2018)            | AAMAS      |
| QMIX: Monotonic Value Function Factorisation for Deep Multi-Agent Reinforcement Learning                                     | Rashid et al. (2018)             | ICML       |
| Learning when to Communicate at Scale in Multiagent Cooperative and Competitive Tasks                                        | Singh et al. (2019)              | ICLR       |
| Actor-Attention-Critic for Multi-Agent Reinforcement Learning                                                                | Iqbal and Sha (2019)             | ICML       |
| Efficient Communication in Multi-Agent Reinforcement Learning via Variance Based Control                                     | Zhang et al. (2019)              | NeurIPS    |
| MAGNet: Multi-agent Graph Network for Deep Multi-agent Reinforcement Learning                                                | Malysheva et al. (2019)          | IEEE       |
| Modelling the Dynamic Joint Policy of Teammates with Attention Multi-agent DDPG                                              | Mao et al. (2019)                | AAMAS      |
| The StarCraft Multi-Agent Challenge                                                                                          | Samvelyan et al. (2019)          | AAMAS      |
| Social Influence as Intrinsic Motivation for Multi-Agent Deep Reinforcement Learning                                         | Jaques et al. (2019)             | ICML       |
| LIIR: Learning Individual Intrinsic Reward in Multi-Agent Reinforcement Learning                                             | Du et al. (2019)                 | NeurIPS    |
| MAVEN: Multi-Agent Variational Exploration                                                                                   | Mahajan et al. (2019)            | NeurIPS    |
| Multi-Agent Common Knowledge Reinforcement Learning                                                                          | Schroeder de Witt et al. (2019)  | NeurIPS    |
| A Structured Prediction Approach for Generalization in Cooperative Multi-Agent Reinforcement Learning                        | Carion et al. (2019)             | NeurIPS    |
| TarMAC: Targeted Multi-Agent Communication                                                                                   | Das et al. (2019)                | ICML       |
| QTRAN: Learning to Factorize with Transformation for Cooperative Multi-Agent Reinforcement Learning                          | Son et al. (2019)                | ICML       |
| Influence-Based Multi-Agent Exploration                                                                                      | Wang et al. (2020a)              | ICLR       |
| Multi-Agent Game Abstraction via Graph Attention Neural Network                                                              | Liu et al. (2020a)               | AAAI       |
| Feudal Multi-Agent Hierarchies for Cooperative Reinforcement Learning                                                        | Ma and Wu (2020)                 | AAMAS      |
| PIC: Permutation Invariant Critic for Multi-Agent Deep Reinforcement Learning                                                | Liu et al. (2020b)               | CoRL       |
| Action Semantics Network: Considering the Effects of Actions in Multiagent Systems                                           | Wang et al. (2020b)              | ICLR       |
| Succinct and Robust Multi-Agent Communication With Temporal Message Control                                                  | Zhang et al. (2020)              | NeurIPS    |
| Learning Multi-Agent Coordination for Enhancing Target Coverage in Directional Sensor Networks                               | Xu et al. (2020)                 | NeurIPS    |
| Learning Nearly Decomposable Value Functions Via Communication Minimization                                                  | Wang et al. (2020c)              | ICLR       |
| Promoting Coordination through Policy Regularization in Multi-Agent Deep Reinforcement Learning                              | Roy et al. (2020)                | NeurIPS    |
| Shapley Q-value: A Local Reward Approach to Solve Global Reward Games                                                        | Wang et al. (2020d)              | AAAI       |
| Deep Coordination Graphs                                                                                                     | Boehmer et al. (2020)            | ICML       |
| Evolutionary Population Curriculum for Scaling Multi-Agent Reinforcement Learning                                            | Long et al. (2020)               | ICLR       |
| Shared Experience Actor-Critic for Multi-Agent Reinforcement Learning                                                        | Christianos et al. (2020)        | NeurIPS    |
| SMIX( $\lambda$ ): Enhancing Centralized Value Functions for Cooperative Multi-Agent Reinforcement Learning                  | Wen et al. (2020)                | AAAI       |
| Learning Transferable Cooperative Behavior in Multi-Agent Teams                                                              | Agarwal et al. (2020)            | AAMAS      |
| Comparative Evaluation of Cooperative Multi-Agent Deep Reinforcement Learning Algorithms                                     | Papoudakis et al. (2020)         | AAMAS      |
| Learning Individually Inferred Communication for Multi-Agent Cooperation                                                     | Ding et al. (2020)               | NeurIPS    |
| Simplified Action Decoder for Deep Multi-Agent Reinforcement Learning                                                        | Hu and Foerster (2020)           | ICLR       |
| Learning Implicit Credit Assignment for Cooperative Multi-Agent Reinforcement Learning                                       | Zhou et al. (2020)               | NeurIPS    |
| Variational Automatic Curriculum Learning for Sparse-Reward Cooperative Multi-Agent Problems                                 | Chen et al. (2021a)              | NeurIPS    |
| Pessimism Meets Invariance: Provably Efficient Offline Mean-Field Multi-Agent RL                                             | Chen et al. (2021b)              | NeurIPS    |
| Deep Implicit Coordination Graphs for Multi-agent Reinforcement Learning                                                     | Li et al. (2021)                 | AAMAS      |
| DFAC Framework: Factorizing the Value Function via Quantile Mixture for Multi-Agent Distributional Q-Learning                | Sun et al. (2021)                | ICML       |
| Scaling Multi-Agent Reinforcement Learning with Selective Parameter Sharing                                                  | Christianos et al. (2021)        | ICML       |
| Towards Understanding Cooperative Multi-Agent Q-Learning with Value Factorization                                            | Wang et al. (2021a)              | NeurIPS    |
| Investigation of Independent Reinforcement Learning Algorithms in Multi-Agent Environments                                   | Lee et al. (2021)                | NeurIPS    |
| Celebrating Diversity in Shared Multi-Agent Reinforcement Learning                                                           | Chenghao et al. (2021)           | NeurIPS    |
| RODE: Learning Roles to Decompose Multi-Agent Tasks                                                                          | Wang et al. (2021b)              | ICLR       |
| Local Advantage Actor-Critic for Robust Multi-Agent Deep Reinforcement Learning                                              | Xiao et al. (2021)               | IEEE MRS   |
| MMD-MIX: Value Function Factorisation with Maximum Mean Discrepancy for Cooperative Multi-Agent Reinforcement Learning       | Xu et al. (2021)                 | IJCNN      |
| The Emergence of Individuality                                                                                               | Jiang and Lu (2021)              | ICML       |
| QVMix and QVMix-Max: Extending the Deep Quality-Value Family of Algorithms to Cooperative Multi-Agent Reinforcement Learning | Leroy et al. (2021)              | AAAI       |
| Weighted QMIX: Expanding Monotonic Value Function Factorisation for Deep Multi-Agent Reinforcement Learning                  | Rashid et al. (2021)             | NeurIPS    |
| Value-Decomposition Multi-Agent Actor-Critics                                                                                | Su et al. (2021)                 | AAAI       |
| Regularized Softmax Deep Multi-Agent Q-Learning                                                                              | Pan et al. (2021)                | NeurIPS    |
| Cooperative Exploration for Multi-Agent Deep Reinforcement Learning                                                          | Liu et al. (2021)                | ICML       |
| Domain-Aware Multiagent Reinforcement Learning in Navigation                                                                 | Saeed et al. (2021)              | IJCNN      |
| Evaluating Generalization and Transfer Capacity of Multi-Agent Reinforcement Learning Across Variable Number of Agents       | Guresti and Ure (2021)           | AAAI       |
| Episodic Multi-agent Reinforcement Learning with Curiosity-driven Exploration                                                | Zheng et al. (2021)              | NeurIPS    |
| Benchmarking Multi-Agent Deep Reinforcement Learning Algorithms in Cooperative Tasks                                         | Papoudakis et al. (2021)         | NeurIPS    |
| Centralizing State-Values in Dueling Networks for Multi-Robot Reinforcement Learning Mapless Navigation                      | Marchesini and Farinelli (2021)  | IROS       |
| QPLEX: Duplex Dueling Multi-Agent Q-Learning                                                                                 | Wang et al. (2021c)              | ICLR       |
| Settling the Variance of Multi-Agent Policy Gradients                                                                        | Kuba et al. (2021)               | NeurIPS    |
| FACMAC: Factored Multi-Agent Centralised Policy Gradients                                                                    | Peng et al. (2021)               | NeurIPS    |
| Multi-Agent Incentive Communication via Decentralized Teammate Modeling                                                      | Yuan et al. (2022)               | AAAI       |
| LIGS: Learnable Intrinsic-Reward Generation Selection for Multi-Agent Learning                                               | Mguni et al. (2022)              | ICLR       |
| ToM2C: Target-oriented Multi-agent Communication and Cooperation with Theory of Mind                                         | Wang et al. (2022)               | ICLR       |
| Trust Region Policy Optimisation in Multi-Agent Reinforcement Learning                                                       | Kuba et al. (2022)               | ICLR       |
| Reinforcement Learning for Location-Aware Warehouse Scheduling                                                               | Stavroulakis and Sengupta (2022) | ICLR       |
| Multi-agent Transfer Learning in Reinforcement Learning-based Ride-sharing Systems                                           | Castagna and Duspacic (2022)     | ICAART     |
| Off-Policy Correction For Multi-Agent Reinforcement Learning                                                                 | Zawalski et al. (2022)           | AAMAS      |
| Local Advantage Networks for Cooperative Multi-Agent Reinforcement Learning                                                  | Avalos et al. (2022)             | AAMAS      |
| A Deeper Understanding of State-Based Critics in Multi-Agent Reinforcement Learning                                          | Xueguang Lyu (2022)              | AAAI       |

### A.3 Annotations

The collected dataset was manually annotated to record methods of algorithm performance evaluation. The dataset records the algorithms, environments and tasks used as well as all aspects relating to the algorithm performance evaluation procedure that was available from the papers. The following provides further details on the data annotation procedure:

- A1. The names and dates of papers are recorded along with the conferences they are published into and research labs associated with the authors.
- A2. The algorithms being evaluated are recorded. In some cases the paper-specific names of algorithms have been appropriately adapted. This is in cases where uniquely named algorithms have only minor differences from their baselines. Further details of this standardisation appear in subsection A.3.2. The algorithm libraries used are recorded when applicable (e.g. EPyMARL Papoudakis et al. (2021)).
- A3. We recorded the MARL environments, their sub-tasks/maps/scenarios and the choice of version used for evaluation. Environment sub-tasks with different names, but which refer to the identical sub-tasks were given standardised names (e.g. cooperative communication is the second name for Speaker-Listener task in MPE).
- A4. With regard to performance measurement, we recorded the aggregation functions across runs or episodes (e.g. means) and, the metrics used (e.g. SMAC win rates or max rewards) along with their measure of spread such as reported confidence interval values or standard deviations. Additionally, to compare between cases of when win rates or rewards are recorded, we report the *general metric* used.
- A5. On occasion, data is only provided from performance plots and not from tables. Hence our dataset records whether data is presented using plots or in tabular form. When data is only provided by plots, we record the final value for a given metric as shown on a plot. For the purpose of our records being as accurate as possible, we ensure these values are within 5% of their true plotted value. Since we cannot exactly determine the confidence bounds from plots alone we omit recording such values in these cases. However, we do still record the type of uncertainty measure used, as presented by the author (and where available elsewhere the uncertainty values).
- A6. The evaluation intervals (evaluation frequency) and independent evaluations per interval (evaluation duration) were also recorded along with their units (e.g. episodes or timesteps). This includes the number of training runs and number of random seeds used. Here, evaluation intervals that refer to the same measurement across papers were standardized (e.g. rounds are changed to episodes).
- A7. We record whether reported results are from previous works, i.e. when reported results are from other cited papers and are not reproduced in the particular paper being recorded.

#### A.3.1 Environments’ annotations

- All SMAC win rates are reported as percentages (out of 100) and not probabilities (out of 1).
- We record an environment as paper-specific if it is created by the authors of a particular paper and is not utilized in any other article.

#### A.3.2 Algorithm annotations

In the process of collecting the data for this paper it came to our attention that several algorithms go by slightly different names across multiple papers. For the purposes of our analysis we have standardised these naming choices, based on algorithm descriptions made by authors in their respective papers, to more standardised naming conventions. *IAC-V* is first mentioned in the paper that presents COMA Foerster et al. (2018). Due to the paper emerging very early into the growth of cooperative MARL naming had not yet been normalised however, *IAC-V* is described as a standard advantage actor-critic (AAC) algorithm using parameter sharing and can instead just be referred to as *IAC*. *PSMADDPG* Mao et al. (2019) is a variant of MADDPG that makes use of parameter sharing which is the norm in many other publications. Interestingly the original MADDPG paper Lowe et al. (2017) does not make use of this. *PSMADDPG* can be considered to be MADDPG with a different implementation choice and is grouped with MADDPG as the underlying algorithm is not altered. Both A3C and A2C

are named in the publications used in this analysis [Wang et al. \(2020b\)](#); [Jaques et al. \(2019\)](#). A2C and A3C refer to the method by which the AAC algorithm is implemented to run using multiple parallel workers with A2C being the synchronous and A3C being the asynchronous variant [Mnih et al. \(2016\)](#). Very early MARL papers referred to independent Q learning simply as Deep Q Network [Tampuu et al. \(2015\)](#). As MARL developed further it became more important to distinguish between independent and centralised learners and DQN is commonly called IQL. Similarly DDPG can be renamed to IDDPG to distinguish it as an independent learning algorithm. The centralised AAC algorithm is also sometimes called a naive critic. Instead we refer to this method as central-V as this is the first formalised name for this algorithm that we could find [Foerster et al. \(2016\)](#). Finally MAPPO [Yu et al. \(2021\)](#) is referred to as MAPPO-shared for MAPPO with parameter sharing. However, parameter sharing is the norm amongst most cooperative MARL publications therefore, MAPPO-shared is simply renamed to MAPPO.

Table 2: Algorithm annotations

| Name from paper                                   | Standardised naming | Our interpretation                           |
|---------------------------------------------------|---------------------|----------------------------------------------|
| IAC-V ( <a href="#">Foerster et al., 2018</a> )   | IAC                 | IAC-V is the same as IAC.                    |
| PSMADDPG ( <a href="#">Mao et al. (2019)</a> )    | MADDPG              | The PS denotes parameter sharing.            |
| A3C ( <a href="#">Wang et al., 2020b</a> )        | IAC                 | Asynchronous parallelization method for IAC. |
| A2C ( <a href="#">Jaques et al., 2019</a> )       | IAC                 | Synchronous parallelization method for IAC.  |
| MADQN ( <a href="#">Tampuu et al., 2015</a> )     | IQL                 | Old naming conventions.                      |
| Naïve critic ( <a href="#">Su et al., 2021</a> )  | Central-V           | Naïve critic is the same as central-v.       |
| MAPPO-shared ( <a href="#">Lee et al., 2021</a> ) | MAPPO               | Parameter sharing is the norm.               |
| MADR ( <a href="#">Park et al., 2020</a> )        | MADDPG              | MADDPG with recurrency.                      |
| DDPG ( <a href="#">Lowe et al., 2017</a> )        | IDDPG               | Denote as independent learner.               |
| DQN ( <a href="#">Tampuu et al., 2015</a> )       | IQL                 | Denote as independent learner.               |

## B Additional Analysis

This section provides additional insights from further analysis on our dataset of performance evaluation for cooperative MARL algorithms.

### B.1 Environment

#### B.1.1 Most used settings

In this section, we are primarily interested in highlighting some of our further findings from the main papers. We first illustrate some of the most widely used settings for the most popular environments as illustrated in Table 3. It should be noted that this analysis was conducted over 29 unique environments with 164 unique scenarios.

Table 3: Most applicable parameters in each environment for the main papers

| Environment  | Metric           | R. Seed   | Aggregate Function | Independent variable | Maps/Tasks | Mentions |
|--------------|------------------|-----------|--------------------|----------------------|------------|----------|
| SMAC         | Win Rate (83.3%) | 5 (41.7%) | Median (48.4%)     | Timestep (97.3%)     | 39         | 37       |
| MPE          | Reward (40%)     | 5 (34.8%) | Mean (85%)         | Episode (48%)        | 25         | 33       |
| Matrix Games | Return (100%)    | 5-10-100  | Mean (100%)        | Timestep (98.7%)     | -          | 9        |
| MazeBase     | Win Rate (87.5%) | 5 (80%)   | Mean (100%)        | Episode (44.1%)      | 2          | 7        |

**StarCraft Multi-Agent Challenge (SMAC):** is a partially observable environment, with a diverse set of sophisticated micro-actions that enable the learning of complex interactions amongst collaborating agents, the fundamental concept of SMAC is a team of agents battling against another group of units. SMAC is the most widely used environment in our analysis, since it is employed as the experimental environment in 37 of the main papers presenting 46.9% of the collected evaluation data. This finding is not surprising as we have recorded 39 unique SMAC scenarios with varying scales of difficulty. Moreover, many authors agree that SMAC offers a fair comparison of different algorithms since it provides an open-source Python-based implementation of numerous fundamental MARL algorithms.

**Multi-Agent Particle Environment (MPE):** is an environment that can be fully or partially observable, cooperative or competitive, and allow communication within some of its tasks. In this environment the agents primarily interact with the landmarks and other entities to achieve various goals. We discover that 33 of the 75 papers employ MPE for algorithm testing, accounting for 20.3% of the collected evaluation data. MPE, like SMAC, is a diversified environment with 25 tasks; nevertheless, we observe a disparity in their utilization, with 27.3% of the main papers utilizing Predator and Prey, followed by Spread which is used in 22.7% of the collected main papers which use the MPE environment.

#### B.1.2 Evolution of environment usage in MARL

In the early years of MARL research there was a shortage of established multi-agent environments, as shown in figure 2<sup>2</sup>. Hence most publications tested their algorithms on environments created by the authors (paper-specific environments) as well as MazeBase. Although MazeBase was developed for single-agent environments, it is easily adaptable to the multi-agent case and was used to create the traffic junction combat tasks. This adaptability drove its early adoption. The Figure depicts that, since 2017, we can observe an increase in the use of MPE tasks like Predator-Prey and Spread, as well as StarCraft unit micromanagement. MPE was the most used environment in 2019 and, since 2020, we see SMAC dominating the others.

<sup>2</sup>The plotted environments occur in at least two papers.

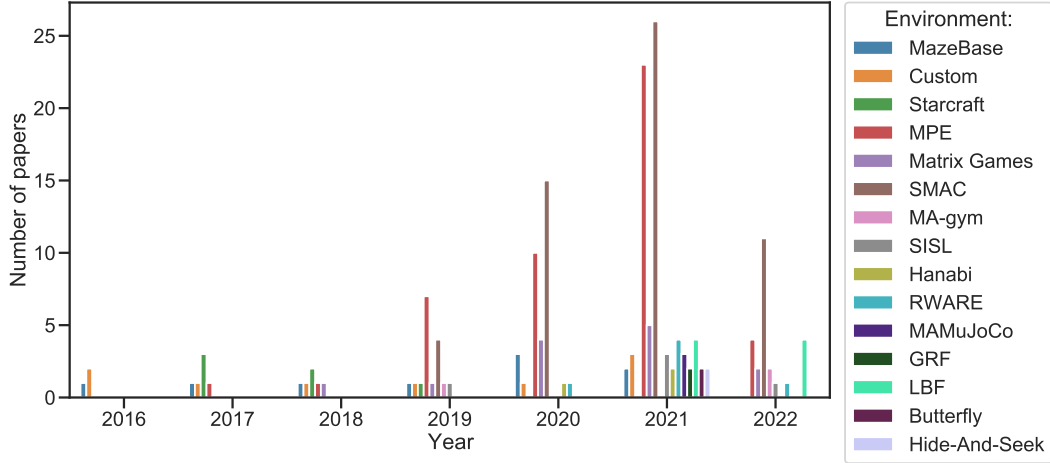

Figure 2: Evolution of environment usage in all the papers

## B.2 Algorithms

### B.2.1 Training schemes analysis

**Independent Learning (IL or DTDE):** is a method that extends single-agent RL algorithms to the multi-agent space. Agents learn an independent policy based on their own local observations and, in the cooperative case, learn a policy based on a shared global reward. This type of learning has low convergence guarantees because the learning of other agents causes the environment to appear non-stationary to each individual agent since the agents’ behavior changes the dynamics of the environment.

**Centralised Training Decentralised Execution (CTDE):** much like IL, CTDE learns decentralised agent policies where agents act based on local observations. However, in the CTDE paradigm we can make use of additional information at training time that is normally not available to agents during execution. Typically this is done by using a *centralised-critic* or some *mixing network* which is allowed to condition on the global environment state information or, has access to open communication channels with all agents. The *centralised-critic* or *mixing network* is only used during training time which aids in finding better agent policies during training time without increasing computational overheads during execution time.

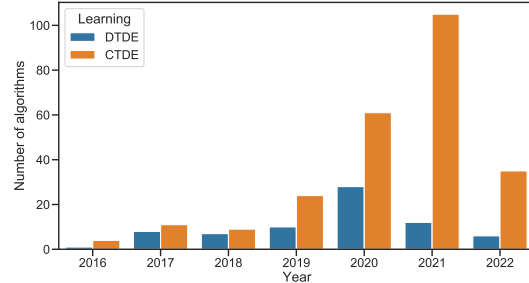

Figure 3: Number of algorithms based on learning schemes by years for all the papers

**Is the decline in the use of IL over time a positive or negative sign?** CTDE has been demonstrated to be a powerful approach that outperforms decentralized training in many cases. Nevertheless, we cannot assume that it is the optimal solution in all cooperative MARL cases, since many studies, have shown that it is still hard for agents to act cooperatively during execution. This is because partial observability and stochasticity can easily break the learned cooperative strategy, resulting in miscoordination. Recently, we observe the increase of communication algorithms. These can make use of *graph neural networks* as a communication channel to help agents obtain information during both training and execution.

### B.2.2 Benchmark algorithms

In our analysis, we examine 150 algorithms where 73.3% are used only once over the 75 main papers. In this section, we provide additional insights from the analysis of our data on the most relevant

algorithms. We summarize the use of these algorithms in our dataset in Table 4.

Table 4: Most used algorithms in the main papers

| Algorithms                        | Type of agent       | CTDE | Policy | Mentions |
|-----------------------------------|---------------------|------|--------|----------|
| QMIX (Rashid et al., 2018)        | Value-based         | Yes  | Off    | 35       |
| MADDPG (Lowe et al., 2017)        | Actor-critic        | Yes  | Off    | 25       |
| VDN (Sunehag et al., 2018)        | Value-based         | Yes  | Off    | 23       |
| COMA (Foerster et al., 2018)      | Actor-critic        | Yes  | On     | 22       |
| IQL (Tampuu et al., 2015)         | Value-based         | No   | Off    | 20       |
| MAPPO (Yu et al., 2021)           | Actor-critic        | Yes  | On     | 10       |
| QPLEX (Wang et al., 2021c)        | Value-based         | Yes  | Off    | 10       |
| QTRAN (Son et al., 2019)          | Value-based         | Yes  | Off    | 08       |
| IAC (Foerster et al., 2018)       | Actor-critic        | No   | On     | 08       |
| CommNet (Sukhbaatar et al., 2016) | Policy optimization | -    | -      | 06       |

We note that one can select approximately five of these widely used algorithms, from Table 4, as baselines, against which one can evaluate the performance of a novel algorithm. As these algorithms are well-studied they may provide a meaningful current set for comparison. Although we list these baselines, we do not consider this list to be exhaustive and researchers should strive to compare their algorithms to algorithms that are currently known to have state of the art (SOTA) performance. The five baselines we choose for discussion encompass both the CTDE and IL paradigm for cooperative MARL as well as policy gradient (PG) and Q-learning based methods. To meet these requirements we discuss QMIX (Rashid et al., 2018), MADDPG (Lowe et al., 2017), COMA (Foerster et al., 2018), IQL (Tampuu et al., 2015) and MAPPO (Yu et al., 2021). Qmix is selected as it introduced the concept of monotonic value-decomposition which formed the basis for the development of many of the recent algorithmic developments. As shown by (Hu et al., 2021), fine-tuned implementations of QMIX can still outperform newer methods that attempt to improve upon the original work. We discuss MADPPG since it was introduced in the most widely cited MARL algorithm paper with 2070 citation at the time of writing. We also note that MADDPG provides a baseline for algorithms that are used in mixed and competitive tasks. Although MADDPG was introduced as an algorithm to be used on environments with continuous action spaces, the algorithm may also be adapted to the discrete case. We discuss CommNet since it is a widely used algorithm, used in scenarios which require agent communication in order to find optimal solutions. Furthermore we discuss MAPPO due to recent work illustrating it’s effectiveness in cooperative MARL tasks (Yu et al., 2021). Lastly, we discuss COMA since it is a widely used actor-critic algorithm. Moreover, each of the algorithms mentioned have open sourced code implementations available (Samvelyan et al., 2019; Papoudakis et al., 2021; Hu et al., 2021) which serve to decrease the amount of time researchers have to spend on implementing baselines to evaluate against.

**QMIX:** is a value-based algorithm introduced by (Rashid et al., 2018) following on from the success of VDN (Sunehag et al., 2018) in cooperative MARL tasks. Similarly to VDN, QMIX makes use of a factorized joint Q-value function to train all agents. What differentiates QMIX from VDN is that individual agents’ utilities are joined using a mixing network instead of only summing them. Furthermore, the mixing network is constrained to having only positive weights, leading to a monotonic factorisation of individual agent utilities, and is allowed to condition on the global environment state during training time. QMIX follows the CTDE training paradigm and makes use of recurrent neural networks for individual agent policies. This enables agents to learn joint policies in partially observable settings. The initial performance of QMIX was illustrated by (Rashid et al., 2018) on the SMAC benchmark.

In our analysis of QMIX, variants of QMIX and algorithms building on QMIX feature most prominently in the 2s3z (18), 3s vs 5z (14), 3s5z (14), MMM2 (13) and 6h vs 8z (11) SMAC scenarios. With numbers in parenthesis denoting the number of papers in which a QMIX variant is benchmarked on a particular scenario.

**CommNet:** (Sukhbaatar et al., 2016) seeks to address the issue of effective agent communication in partially observable cooperative settings. What differentiated CommNet from previous communication works is that the communication protocol between agents is not fixed, but instead learnt as a

neural model alongside agent training. This is possible due to agent communication being modeled using a continuous, differentiable vector which is output by each agent. We find that CommNET is used, most widely, on the TrafficJunction suite of environments which we find to be one of the most widely used communication benchmarks for MARL.

**Multi-Agent Deep Deterministic Policy Gradient (MADDPG):** introduced by (Lowe et al., 2017), is a multi-agent extension to the DDPG algorithm introduced by (Lillicrap et al., 2015). MADDPG is an off-policy actor-critic type of algorithm. By default, each agent has a unique policy network and Q-value critic network. Each agent’s policy is only allowed to condition on an agent’s partial observation of the full environment state while, during training time, each critic conditions on the actions selected by the policy networks of all other agents. MADDPG makes use of standard MLPs for both the agent policy and critic networks but variations of MADDPG exist which make use of recurrent neural networks (RNNs) for agent policies. Similarly, variations of MADDPG exist which make use of weight sharing across agent networks to aid in speedups of algorithm training. An advantage of MADDPG is that the algorithm is inherently applicable to both competitive, cooperative and mixed environments. This versatility is displayed in the seminal paper by (Lowe et al., 2017). In our analysis, MADPPG is most widely used for benchmarking on the multi-agent particle environment suite (MPE) with the algorithm being most widely used on the Predator-Prey (12), Spread (10) and Speaker-Listener (5) scenarios.

**Multi-Agent Proximal Policy Optimization (MAPPO):** is a multi-agent extension to the single-agent Proximal Policy Optimization (PPO) algorithm and mentioned explicitly by (Yu et al., 2021). Similarly to PPO, MAPPO makes use of a value function, conditioned on the global environment state, to serve as a baseline leading to reduced variance in policy-gradient optimization. Furthermore, MAPPO may be implemented in the CTDE or IL paradigms depending on whether the value function is allowed to condition on some representation of the global environment state or only on an agent’s local observation of the environment.

In our analysis, we find that MAPPO is used an equal amount of times (4) on the corridor, (3) MMM2, 5m vs 6m, 3s5z SMAC scenarios as well as on (2) the spread MPE scenario.

**Counterfactual Multi-Agent Policy Gradients (COMA):** is an actor-critic algorithm the makes use of the CTDE paradigm by using a centralized critic, which is allowed to condition on the full environment state, with decentralized actors. This centralized critic is used during training time only and foregone at execution time. The core contribution of COMA is through addressing the agent credit assignment issue in MARL by utilizing a *counterfactual* advantage function that is unique to each agent. In our analysis we find that COMA is used most frequently in the 2s3z (11), 3s5z (7), 1c3s5z (7) and the 3m (6) SMAC scenarios, as well (6) the Spread scenario from MPE.

### B.3 Evaluation Settings

#### B.3.1 Metric

In general, metrics are used to monitor and quantify a model’s performance. Through our analysis, we identify 25 unique metrics, which after unifying the data, based on our annotations as given in A4, we obtain 12 general metrics over the published papers.

The most common three metrics, referred to in our data are, **Return**, **Reward** and **Win Rate** which are in 31.3%, 14.6% and 50% of the main papers respectively. It is interesting to note that **Win Rate** is such a widely used metric, especially since it is environment specific. We believe this high percentage is due to the high use of the SMAC and Traffic junctions environments which commonly use Win Rate.

We observe dependencies between the choice of the environment and metrics. Out of the collected SMAC data from the main papers 80.9%

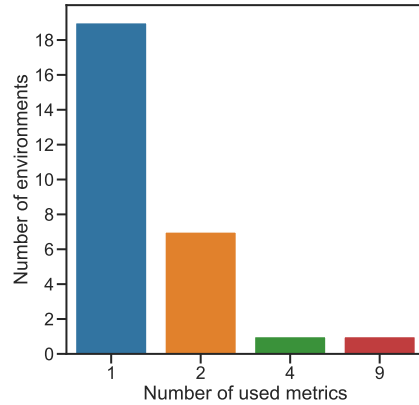

Figure 4: Number of metrics used per environment.

use *Win Rate* as a metric, meanwhile in MPE, out of the 720 rows of collected data related to the MPE environment, 35% use *Return* and 25.1% use *Reward*. Moreover, out of 29 environments over the main papers, we find 19 use one only metric type.

### B.3.2 Independent runs

Independent training runs can take place across different **random seeds**. In some experiments multiple runs are completed for each random seed, for a fixed set of random seeds. Fixing the random seed is an attempt to control some of the experiment’s sources of randomness. The number of runs is important in determining the reliability of the evaluation. More independent runs provide more data which allows for authors to report more accurate measures of spread alongside the point estimates of algorithm performance.

The authors used to employ 10 to 20 runs in the Unit Micromanagement version of the StarCraft environment, but since StarCraft II (SMAC) emerged, authors tend to use only around 5 independent runs. This decline may be due to the environment being more computationally expensive to run. However, we argue, similarly to (Agarwal et al., 2021) for the importance of having 10 independent training runs for reliable confidence intervals.

### B.3.3 Aggregate function

An aggregate function, also known as a measure of central tendency, is a single value that intends to portray information about multiple results by determining the central position among a group of various results. For aggregations over algorithm performance, we differentiate between two aggregation steps: the first, which we refer to as the *local aggregate function*, denotes how aggregation is done across evaluation episodes/evaluation runs in a fixed training run. The second, is the *global aggregate function*. This denotes how we aggregate across independent training runs.

The performance of MARL algorithms is often reported using a point estimate of some task performance metric, such as the **mean** and **median** aggregated over the independent training runs. The mean is the most frequently used aggregation function, accounting for over 41.7% of all data gathered from the main papers. It was the only utilized aggregate function in the early years of our recorded dataset. Since 2019, we have seen the introduction of the median as an aggregate function, with the launch of SMAC, and it has become one of the most widely used aggregate functions in SMAC, with some limited use in MPE. The widespread use of the median as an aggregate function can be attributed to the evaluation guideline proposed by (Samvelyan et al., 2019).

### B.3.4 Measure of spread

The measure of spread plays an important role in delivering first hand information about the experiment findings. It expresses how far apart values are in a distribution and it provides a measure of the variability of values obtained across different random seeds or runs. It also serves as a basic way to quantify the uncertainty in a reported point estimate.

In our study, we discovered that 26 out of 75 studies did not mention the measure of spread at all. In some cases this resulted from when performance is only measured over one run, in other cases this is due to a lack of reported details within a paper. In statistics, there are various fundamental measures of spread, the following are the most frequently encountered in our MARL dataset:

**Standard deviation:** is a common measure of dispersion of a set of values from their mean. The standard deviation will be modest if the values are clustered together. Widely dispersed values will result in a larger standard deviation.

**Confidence interval (CI):** These provides an estimated possible range for an unknown value. We can choose from a variety of confidence limitations, where some of the most frequent are a 95% or a 99.5% confidence interval.

**Inter-quartile range:** This is a measure of dispersion which has the advantage of not being impacted by outliers and is important when the researchers want to know where the majority of the findings fall. It is used in 10 papers out of the main ones and it is commonly used in SMAC presenting 41.1% of the SMAC collected data over the published cooperative papers.

### B.3.5 Time Measurement

**Independent Variable:** The training and evaluation time is a vital feature that must be stated by the author for a fair comparison of studies. We identified 9 options to define the independent experiment variable from the main papers, but the most commonly used measure is **time-steps**, which is employed in 39 papers, followed by **episodes**, which accounts for 18 studies. We discover an imbalance where the independent variable being used is strongly related to the environment, with 88.3% of SMAC collected data using time-steps as an independent variable and 39.2% of MPE collected data using episodes.

**Evaluation intervals (evaluation frequency):** is generally associated with the SMAC evaluation protocol. It refers to the fixed number of time-steps  $T$ , after which training is suspended, to be able to evaluate an algorithm for a fixed number of runs/episodes  $E$ . During these evaluation runs agents are usually only allowed to act greedily and in a decentralized manner. The test win rate is the percentage of episodes  $e$ , in  $E$ , for which the agents defeat all enemy units within the time limit. Although this is predominantly employed in SMAC experiments, occurring in 13 out of the 37 main papers that use SMAC, this evaluation approach is also used in the MPE and Level-Based Foraging (LBF) environments, with 6 and 2 papers adopting this methodology in these cases, respectively. The evaluation frequency must ideally be associated with a duration  $E$  which we record as the evaluation duration.

**Number of independent evaluations per interval (evaluation duration):** as the name indicates, this is the amount of evaluations that are performed at each evaluation interval. This detail is required if an evaluation frequency is given, but it may also be provided by itself in the case evaluation is performed of the entire duration of an experiment.

## B.4 Evaluation procedure, best practices and guideline

In this section, we summarize, in Table 5, the number of papers that abide by the key practices that are recommended in the main body of this paper. We also show what percentage of the main papers and other papers include each specific practice in their evaluation and reporting protocol.

Table 5: Number and percentage of papers recorded that follow the details of the recommended evaluation guideline.

| Evaluation and Implementation details                           | The main papers |    |       | The other papers |    |       |
|-----------------------------------------------------------------|-----------------|----|-------|------------------|----|-------|
|                                                                 | Yes             | No | %     | Yes              | No | %     |
| <b>Experiment details</b>                                       |                 |    |       |                  |    |       |
| Evaluate on multiple Environments                               | 38              | 37 | 50.7% | 18               | 19 | 48.6% |
| Evaluate on multiple Scenarios                                  | 65              | 10 | 86.7% | 36               | 01 | 97.3% |
| <b>Evaluation procedure details</b>                             |                 |    |       |                  |    |       |
| Report the training time                                        | 65              | 10 | 86.7% | 26               | 11 | 70.3% |
| Report the independent runs                                     | 53              | 22 | 70.7% | 26               | 11 | 70.3% |
| Report the global aggregate function                            | 54              | 21 | 72.0% | 30               | 07 | 81.1% |
| Report the measure of spread                                    | 49              | 26 | 65.3% | 21               | 16 | 56.7% |
| Report the evaluation interval (evaluation frequency)           | 20              | 55 | 26.7% | 09               | 28 | 24.3% |
| Report the number of evaluation runs (evaluation duration)      | 26              | 49 | 34.7% | 16               | 11 | 43.2% |
| Use statistical tests                                           | 01              | 74 | 01.3% | 00               | 37 | -     |
| <b>Guideline &amp; Best practices</b>                           |                 |    |       |                  |    |       |
| Training for 2M timesteps                                       | 20              | 55 | 26.7% | 07               | 30 | 18.9% |
| Train on-policy for 20M and off-policy for 2M timesteps         | 02              | 73 | 02.7% | 00               | 37 | -     |
| Use independent evaluation episodes per interval with $E = 32$  | 04              | 71 | 05.3% | 01               | 36 | 02.7% |
| Evaluation every 10000 timesteps                                | 04              | 71 | 05.3% | 03               | 34 | 08.1% |
| Use Mean Return metric                                          | 14              | 61 | 18.7% | 05               | 32 | 13.5% |
| Use Absolute metric                                             | 02              | 73 | 02.7% | 00               | 37 | -     |
| Use 95% CI as a measure of spread                               | 16              | 59 | 21.3% | 02               | 35 | 05.4% |
| Report plot results                                             | 71              | 04 | 94.7% | 33               | 04 | 89.2% |
| Report tabular results                                          | 40              | 35 | 53.3% | 27               | 10 | 73.0% |
| Ablation study                                                  | 33              | 42 | 44.0% | 18               | 19 | 48.6% |
| Same baseline algorithms over all the experiment’s environments | 54              | 21 | 72.0% | 27               | 10 | 73.0% |
| Aggregate over the different maps and/or environments           | 08              | 67 | 10.7% | 02               | 35 | 05.4% |
| Public repository                                               | 36              | 39 | 48.0% | 13               | 24 | 35.1% |

## B.5 About SMAC

In this section we will raise challenges uncovered in our analysis rather than provide answers. All challenges that are highlighted will be accompanied by all of relevant facts, as found in our dataset, and are from the SMAC benchmark. We are not attempting to criticize the current scenarios or the environment itself, but want to emphasize the need of advocating for the use of SMAC to be standardized such that algorithm designers are limited to specified scenarios when testing their algorithms. The reason for this is to ensure fair comparison between works.

As we indicated in the environment section, SMAC is a popular benchmarking environment and we discovered that 13 publications out of 75 apply only SMAC to prove the trustworthiness of their experiment. We notice that, despite the fact that SMAC provides many testing scenarios (39 used ones in the published papers), most publications only employ a few of them in their reported trials, as seen in figure 5.

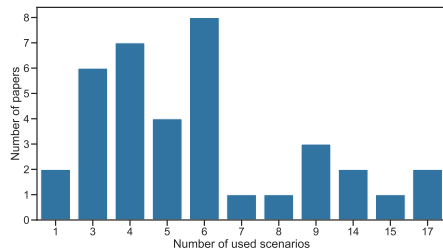

Figure 5: Number of used SMAC scenarios per paper

**What are the features needed to define the difficulty of a scenario?** After analyzing the win rate distribution under various settings, we discovered that several scenarios that were thought to be simple through using independent learning algorithms. A clear example of this is illustrated in Figure 6 by the shift in the win rate distribution for CTDE and DTDE algorithms evaluated on the corridor scenario.

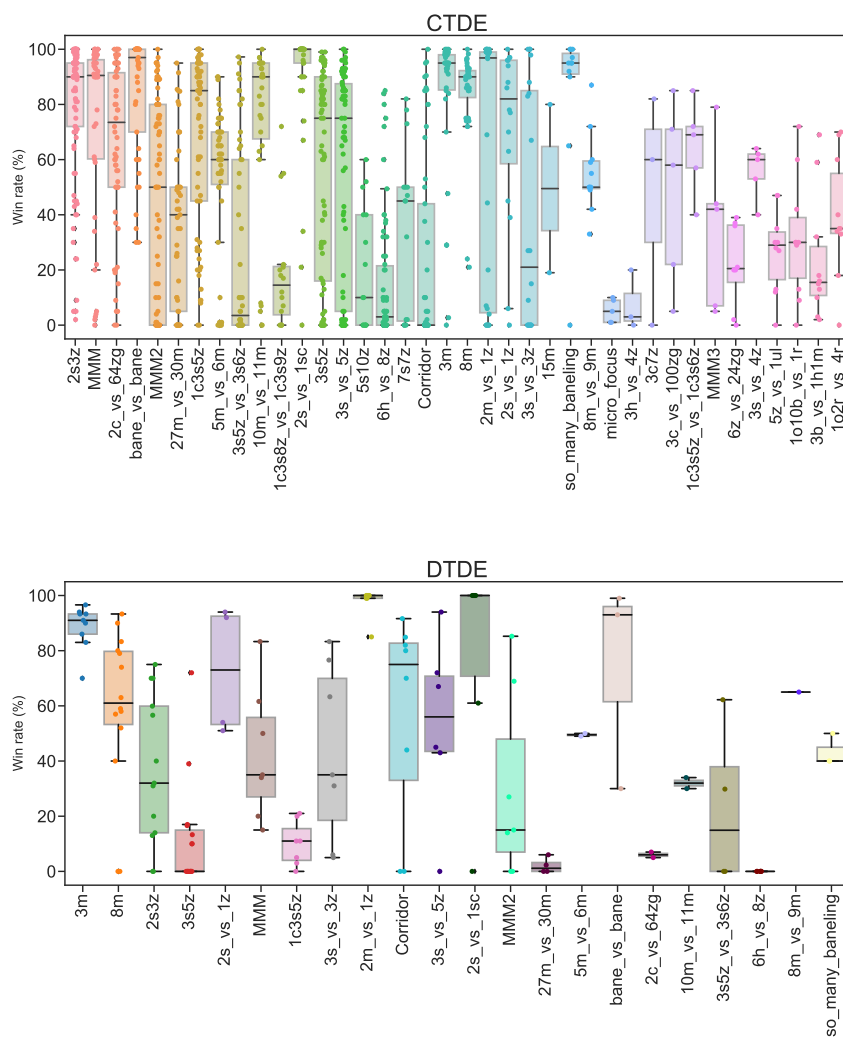

Figure 6: SMAC win rate distribution based on training schemes from The main papers

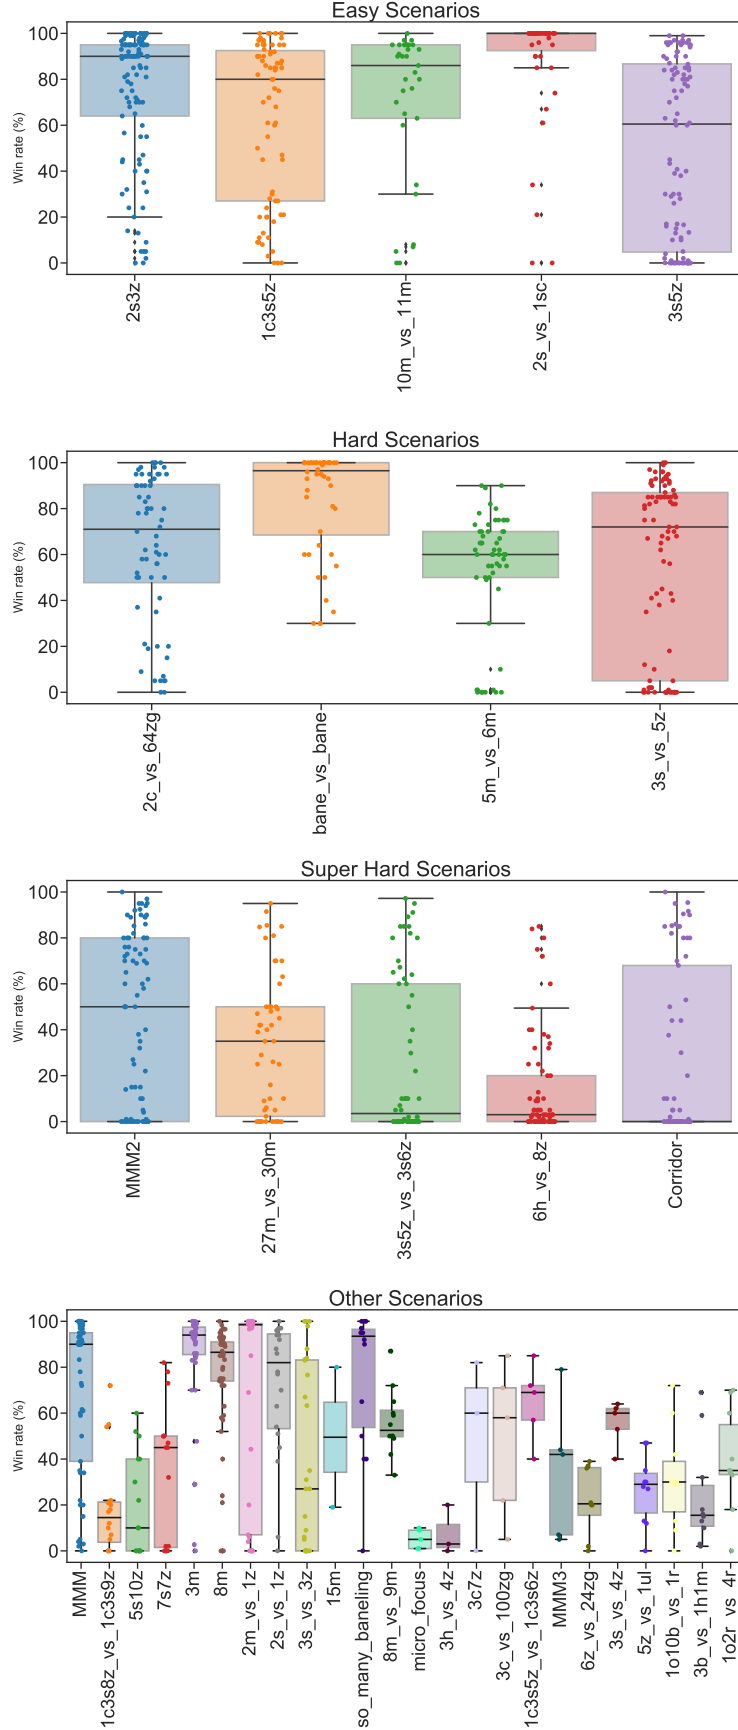

Figure 7: SMAC win rate distribution based on difficulty from The main papers

Furthermore, figure 8 emphasizes the importance of training until 2M timesteps. It demonstrates how the win rate, for even the easiest scenarios, has a wide spread when algorithms are trained for less than 2 million time steps. It can also be noted that, when algorithms are trained up to 2 million timesteps or more, that performance convergences to a higher win rates, not only for easy scenarios but also for hard and even super hard ones.

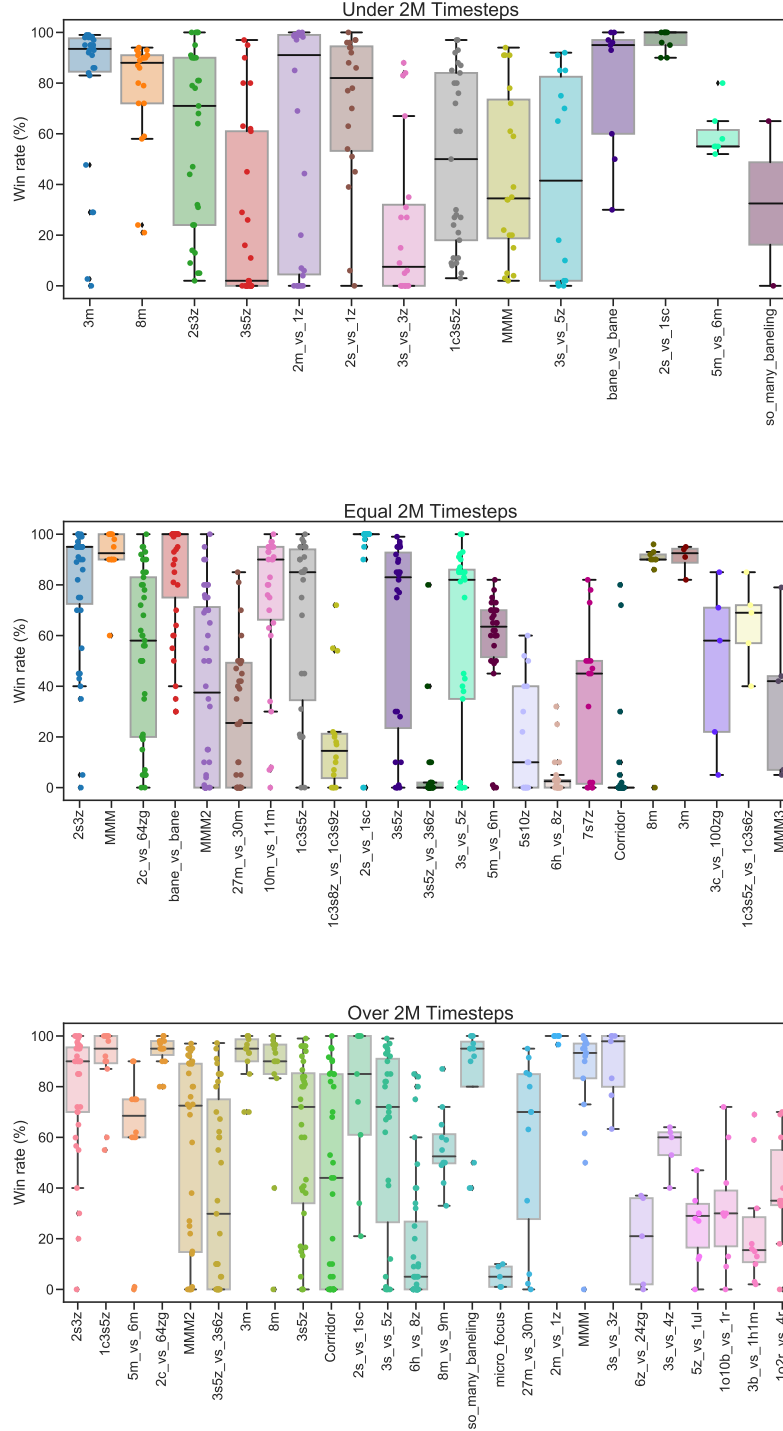

Figure 8: SMAC win rate distribution based on training time from The main papers

**Which scenario to choose?** The choice of the scenarios for an algorithm designer is a critical task, considering the fact that each scenarios itself in SMAC has its own challenges, which can work in the algorithm’s favor (e.g. IA2C in Corridor) or in its misfortune (e.g. IA2C in MMM2). Moreover, 50% of the scenarios were used in one or two papers only, some of these scenarios were used for ablation studies or for a specific research direction like communication, nevertheless most of them do not have prior justification.

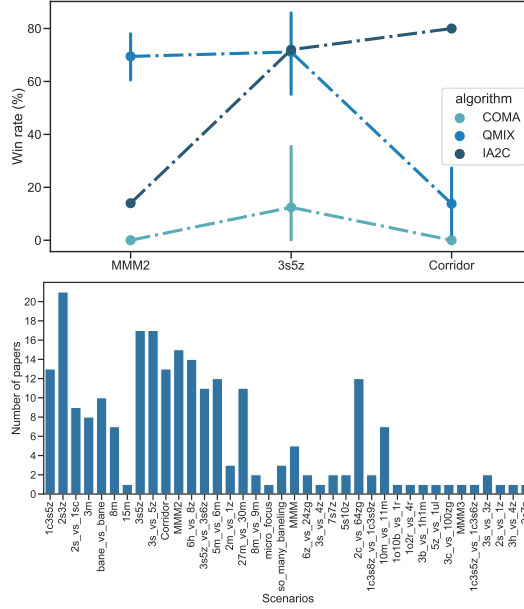

Figure 9: **Top:** The performance of COMA, QMIX and IA2C in 3 different SMAC scenarios. **Bottom:** Number of papers that use each scenario over the main papers

**Is the inconsistency in performance inescapable?** In Figure 10, we fixed the training steps to be 2 million for all recorded papers that use the bane vs bane, MMM2, 3m and 27m vs 30m SMAC scenarios. We achieve this by reading algorithm performance from plots produced in all relevant papers. It is known that the version of SMAC that is used can have an effect on algorithm performance, but here we see that merely fixing the training time steps across multiple papers leads to even greater performance discrepancies between papers than the SMAC version being used.

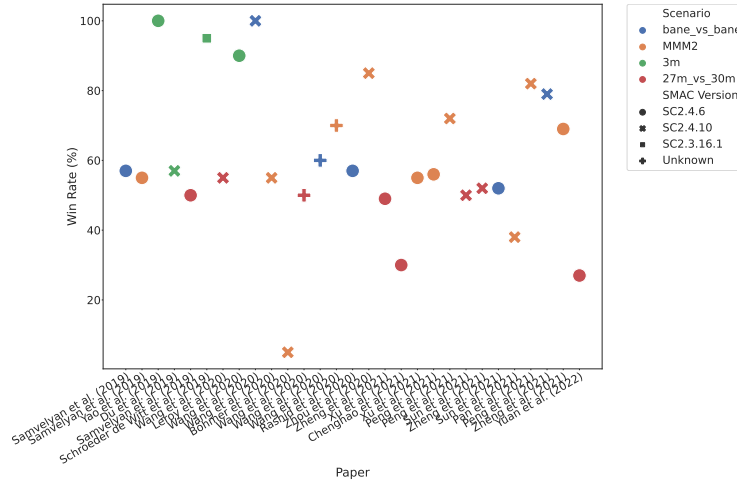

Figure 10: Performance of QMIX on different SMAC scenarios trained for 2M timesteps

## C Guideline

### C.1 Motivation

In the following section, we will demonstrate our evaluation guideline. We follow the steps as outlined but omit ablation studies in our work since we are not trying to introduce a novel algorithm. We also have not tuned any hyperparameters for any of the algorithms we consider. We wish to make the reader purposefully aware that the primary goal of this experiment is to provide an illustration of how to use our evaluation guideline and our experiment is not focused on the performance of the chosen algorithms. As such we are not striving to achieve state of the art performance on the flatland benchmark and will merely illustrate how results may be interpreted by a researcher.

Please note that, following our guideline, we make all raw data of our experiments available. Our code will be made publicly available soon. We provide a LaTeX template for the proposed reporting templates 6. We envision that such a template will make it easier for other authors to define and report all details pertaining to their experiments. These include experimental details, evaluation protocols, environment settings and all other details that authors wish to report. Of course, it’s up to the author to choose the set of hyperparameters to be reported according to the algorithm class and its specific hyperparameters.

### C.2 Reporting templates

Here, we present an example of a template that can be used to summarise the important information required to perform the evaluation of algorithms, see Table 6.

Firstly, we have to list all the set of algorithms we are comparing. For hyperparameters we suggest listing all tunable parameters which are manually set by the researcher. Some parameters like the *discount factor* are fairly consistent throughout published works and can easily be reused across papers. Other parameters can vary through papers due to computational constraints like *batch size* which can be limited by the available RAM of the GPU used in training and sometimes needs to be adjusted based on compute limitations and, *replay buffer size* which is limited by the available RAM of the training computers. Parameters like the *target network update period* and  $\epsilon$  *schedule* are required to replicate the training scheme used by an algorithm as when mistuned they greatly alter results Rashid et al. (2021).

Network architecture is also an important consideration for MARL algorithms. QMIX is one of the most popular value-decomposition methods in cooperative MARL and makes use of *hypernetworks* to train the central critic. The parameterisation of these *hypernetworks* must also be noted as their configurations have a strong effect on the effectiveness of the central critic. The central critic for QMIX inspired value-decomposition methods is commonly called a *mixing network* and is responsible for performing multi-agent credit assignment during training. The *mixing networks* can vary across different methods but, without knowing how they are parameterised it is possible for networks to have a large variance in their complexity which makes direction comparisons difficult to interpret Hu et al. (2021)

Additionally not all methods consistently make use of recurrency in their architecture which is important for achieving high performance in partially observable settings. Parameter sharing is also unique the cooperative MARL setting and used in most publications however, not all papers make use of this paradigm.

Code-level optimisations consist of any parameters that can be included in algorithm implementation but are not core components of the algorithm but can be used to improve performance. *Reward normalisation* is when the rewards over the episode are normalised which reduces variance and makes learning easier Yu et al. (2021). Not all settings make use of normalised rewards but they can be trivially implemented in a code level. *Death masking* is important to note as different frameworks deal with dead agents in different manners which can make direct comparisons difficult. *Clipped updates* are used in come papers to prevent exploding gradients and can be trivially implemented in most deep learning frameworks. *Eligibility traces* can be used to adjust the variance and bias trade off for return calculations and are tuned using the  $\lambda$  parameter. Although using  $TD(\lambda)$  returns has been shown to improve performance for MARL algorithms it is not universally used and must be taken into account for evaluation. Optimiser choice has also been shown to have a large impact on the performance of MARL algorithms and cannot be interchanged arbitrarily (Yu et al. (2021)).

Computational resources, although not important for algorithmic development are still relevant to research. Clarity of the resources required for a publication to be replicated provide an indication to researchers as how feasible replication is and, how similarly optimised their own implementations are. It also makes it clear where methods may perform better at the cost of compute.

Evaluation protocols need to be made clear in publications so that the results are easy to interpret. By providing all evaluation in the template details readers do not need to pick through a paper to determine how to interpret results. The evaluation framework and the version that is being used is also of importance. Evaluation frameworks are frequently updated and results might be incomparable in-between versions.

Finally it is important to provide the configurations of the environments being used to train and evaluate the algorithm. On one hand, in sample evaluation allows to evaluate an algorithm performance on an environment configuration similar to the configurations it was trained on. On the other hand, out-of sample configurations help to test the ability of the algorithm to generalise to a different configuration of the environment that were not seen in the training. It is obvious that there are many standardised settings in MARL. There are also cases of publications using custom environments which are non-standard when compared to existing publications. These non-standard settings require a full show of specifications to make them easier to understand.

Table 6: Proposal for reporting experimental details

| Experimental setup                                                  | Algo 1   | Algo 2                       | Algo 3                           |
|---------------------------------------------------------------------|----------|------------------------------|----------------------------------|
| Hyperparameters                                                     |          |                              |                                  |
| Discount factor                                                     |          |                              |                                  |
| Batch size                                                          |          |                              |                                  |
| Replay buffer size                                                  |          |                              |                                  |
| Minimum replay buffer size before updating                          |          |                              |                                  |
| N steps bootstrapping                                               |          |                              |                                  |
| Target network update period                                        |          |                              |                                  |
| $\epsilon$ schedule (Decay steps, $\epsilon$ start, $\epsilon$ min) |          |                              |                                  |
| Value Network architecture                                          |          |                              |                                  |
| Value Network initializer                                           |          |                              |                                  |
| Value Network Layer size                                            |          |                              |                                  |
| Value Network Layer normalisation                                   |          |                              |                                  |
| Mixing network (architecture, size, activation)                     |          |                              |                                  |
| Hypernetworks (size, activation)                                    |          |                              |                                  |
| Parameter sharing                                                   |          |                              |                                  |
| Parallel workers                                                    |          |                              |                                  |
| Seed range                                                          |          |                              |                                  |
| Code-level optimisations                                            |          |                              |                                  |
| Optimiser (type, parameters)                                        |          |                              |                                  |
| Learning rate                                                       |          |                              |                                  |
| Reward normalisation                                                |          |                              |                                  |
| Death masking                                                       |          |                              |                                  |
| Clipped updates                                                     |          |                              |                                  |
| Eligibility trace                                                   |          |                              |                                  |
| $TD(\lambda)$ value                                                 |          |                              |                                  |
| Computational resources                                             |          |                              |                                  |
| Average Wall-clock time per algorithm                               |          |                              |                                  |
| CPUs per experiment                                                 |          |                              |                                  |
| GPU per experiment                                                  |          |                              |                                  |
| RAM per experiment                                                  |          |                              |                                  |
| Evaluation protocol                                                 |          |                              |                                  |
| Total training (timesteps)                                          |          |                              |                                  |
| Evaluation interval (timesteps)                                     |          |                              |                                  |
| Independent evaluation episodes                                     |          |                              |                                  |
| Absolute metric (evaluation episodes, aggregation method)           |          |                              |                                  |
| Local aggregation method                                            |          |                              |                                  |
| Global aggregation method                                           |          |                              |                                  |
| Metrics [Environment 1 name ]                                       |          |                              |                                  |
| Metrics [Environment 2 name ]                                       |          |                              |                                  |
| Metrics [Environment 3 name ]                                       |          |                              |                                  |
| Exploration behaviour                                               |          |                              |                                  |
| MARL Framework                                                      |          | name (version)               |                                  |
| Environment settings                                                |          |                              |                                  |
| Environment 1 name (version)                                        | Training | In sample evaluation configs | Out of sample evaluation configs |
| Env related configs                                                 |          |                              |                                  |
| Environment 2 name (version)                                        | Training | In sample evaluation configs | Out of sample evaluation configs |
| Env related configs                                                 |          |                              |                                  |
| Environment 3 name (version)                                        | Training | In sample evaluation configs | Out of sample evaluation configs |
| Env related configs                                                 |          |                              |                                  |

### C.3 Experiment details

Firstly we note the algorithms used for the experiments. For illustration purposes we use IQL which is an independent learning algorithm, VDN which is a linear value-decomposition method finally QMIX which is a value-decomposition method that makes use of a central critic. It is important to note that not all parameters are applicable to all types of algorithm.

### C.3.1 Environment

An environment can present various factors of variations forming two different context sets: the first being the set of all supported random seeds which makes use of Procedural Content Generation (PCG) and the second is the product of multiple factors of variations inside the environment. It has been noted that procedurally generated environments may reduce the precision of research [R. Kirk and Rocktäschel \(2021\)](#) while being able to control a factor of variations in an environment offers more flexibility to create environment configurations that match the evaluation of different algorithmic strengths. Regardless of the context being used, we strongly advocate that researchers should report all the environment settings used for training and for evaluation, See Table 6, Environment settings section as an example for reporting environment settings. Of course, all settings are environment specific.

For our experiments, we make use of the Flatland benchmark environment [Mohanty et al. \(2020\)](#) first introduced as a challenge in 2020 to investigate solution to the vehicle rescheduling problem in railway systems. At a high-level, Flatland is a highly customisable, simplified 2D grid environment which aims to simulate the routing of trains from one city to another.

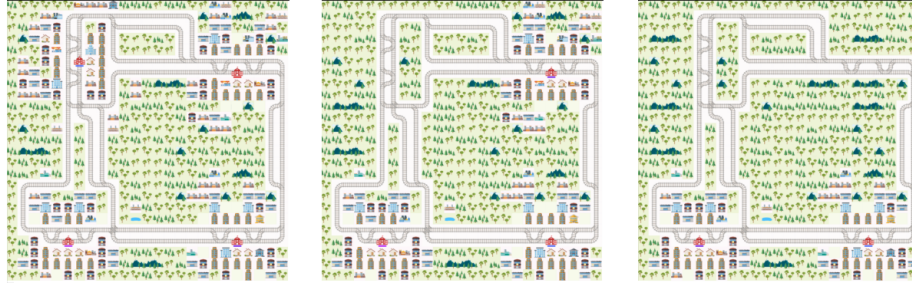

Figure 11: Flatland maps varying between consecutive environment episodes.

We particularly choose Flatland as a benchmarking environment due to the fact that the environment may be set to be non-static allowing it to change after each completed episode during both training and evaluation. This enables us to test the ability of algorithms to generalize outside of experience that was encountered during training. Flatland offers a high level of customisability with regards to this environment regeneration, but we opt for a relatively limited and simple approach. Once a map has been generated, we keep the rails of the map fixed but we allow the number stations on the map to be randomly distributed at each new episode. This changes the location on the map where an agent starts at each episode as well as the destination that each agent must reach. An example of how the maps might change over 4 episodes is demonstrated in Figure 11.

**Observation space.** For the observations of each agent, we make use of what the Flatland authors refer to as tree observations. For these observations, an agent is allowed to construct a tree in four directions which follows permitted transitions. These trees are allowed to pass a fixed number of points on the grid where more than one action is allowed with these points being referred to as *switches* by the authors. Each agent is then allowed to observe the grid up to a fixed number of switches (referred to as the maximum permitted tree depth) and then constructs local features based on the observed tree. These features then inform the agent’s decision making.

For all algorithms, each agent only makes use of its own local tree observation to inform its action selection. Since Flatland does not return a global state for the entire grid at each training time step on which QMIX can condition its mixing network during training time, we construct a simple global state representation which is the concatenation of all agents’ local observations.

**Action space.** The action space in flatland is *discrete*(5) and consists of the following actions:

- Move forward,
- Select a left turn,
- Select a right turn,

- Halt on the current cell,
- Take no action.

**Reward structure.** At each environment time step each agent,  $i$  receives a reward calculated as:

$$r_i(t) = \alpha r_l^i(t) + \beta r_g(t)$$

Here  $r_l^i$  denotes an agent’s local reward which is -1 for all timesteps until an agent reaches its destination after which it is 0 until episode termination.  $r_g$  denotes an additional team reward of 1 which is received by all agents when all agents have reached their destination during an episode.  $\alpha$  and  $\beta$  are adjustable parameters which govern agent cooperation.

After an episode is completed each agent receives a return  $g_i$  which is computed as:

$$g_i = \sum_{t=1}^T r_i(t)$$

In order to keep track of team performance, we monitor and report the mean team episode return which may be calculated for  $N$  agents as

$$g_t = \frac{1}{N} \sum_i^N g_i$$

Aside from only keeping track of the team return, we also record the team completion rate which is the proportion of agents that were able to reach their destination in a given episode.

#### C.4 Evaluation protocol and experimental procedure

Detailed flatland experiments’ settings are given in Table 7. We perform 10 independent runs, each with a unique random seed for the initialization of the agent policy networks. For each independent run we evaluate algorithm performance for 32 episodes at every 10000 environment time steps. During these evaluation intervals we freeze training such that agent policy network weights remain fixed and agents are only allowed to act greedily by selecting actions which an agent believes to have to highest Q-values. In order to report the overall team performance, we report the mean return and completion over of all agents in the environment at each episode. It should be noted that in Flatland agents receive their reward at the end of an episode and therefore episode returns and rewards are equivalent. In order to normalize the episode returns we keep track of the maximum and minimum return obtained over all evaluation episodes done during training for a given independent run and the normalize the mean episode return of each evaluation episode according to these global maximum and minimum values. In order to obtain the per task results, we compute the mean and 95% CI over all independent runs at each evaluation interval for both the normalised mean returns and the completion rate. Additionally, for each independent training run, we keep track of both the maximum mean return and maximum completion rate computed at each evaluation interval and use these values to checkpoint the agent network parameters where performance for both these metrics are optimal. Once an independent run is complete we then evaluate the algorithm greedily for 320 episodes using the best model parameters found for both the mean episode return and completion rate and take the mean over these roll outs to compute the absolute metrics for both the completion rate and the mean episode return. In all cases we opt to use the mean instead of the inter-quartile mean since we assume there to be relatively few outliers due to the fact that all results are generated using the same fixed policy. For each independent run, we then normalise the absolute metrics across all algorithms that were being tested such that all absolute metrics fall within the range  $[0, 1]$ . In all cases it should be noted that, since the goal of normalisation is to constrain metrics to lie within the same  $[0, 1]$  interval we omit normalising metrics that inherently lie on such a range, like the completion rate. Since we have only one task, we then construct a  $(10 \times 1)$  vector per algorithm using the obtained normalised metrics in order to make use of the tools provided by (Agarwal et al., 2021) and obtain the following results.

Table 7: Reporting Flatland experimental details

| Experimental setup                                                  | IQL                   | QMIX                                      | VDN               |
|---------------------------------------------------------------------|-----------------------|-------------------------------------------|-------------------|
| Hyperparameters                                                     |                       |                                           |                   |
| Discount factor                                                     | 0.99                  | 0.99                                      | 0.99              |
| Batch size                                                          | 32                    | 32                                        | 32                |
| Replay buffer size                                                  | 5000                  | 5000                                      | 5000              |
| Minimum replay buffer size before updating                          | 32                    | 32                                        | 32                |
| N steps bootstrapping                                               | 5                     | 5                                         | 5                 |
| Target network update period                                        | 100                   | 200                                       | 200               |
| $\epsilon$ schedule (Decay steps, $\epsilon$ start, $\epsilon$ min) | (100000,1.0,0.05)     | (100000,1.0,0.05)                         | (100000,1.0,0.05) |
| Value Network architecture                                          | Recurrent             | Recurrent                                 | Recurrent         |
| Value Network initializer                                           | Variance Scaling      | Variance Scaling                          | Variance Scaling  |
| Value Network Layer size                                            | [64,64] GRU           | [64,64] GRU                               | [64,64] GRU       |
| Value Network Layer normalisation                                   | True                  | True                                      | True              |
| Mixing network (architecture, size, activation)                     | -                     | Feedforward,[32], ReLU                    | -                 |
| Hypernetworks (size, activation)                                    | -                     | [64], ReLU                                | -                 |
| Parameter sharing                                                   | Yes                   | Yes                                       | Yes               |
| Parallel workers                                                    | 8                     | 8                                         | 8                 |
| Seed range                                                          | {0..9}                | {0..9}                                    | {0..9}            |
| Code-level optimisations                                            |                       |                                           |                   |
| Optimiser (type, parameters)                                        | Adam                  | Adam                                      | Adam              |
| Learning rate                                                       | 1e-4                  | 1e-4                                      | 1e-4              |
| Computational resources                                             |                       |                                           |                   |
| Average Wall-clock time per algorithm                               | 9h27m                 | 9h36m                                     | 9h16m             |
| CPUs per experiment                                                 |                       | 20                                        |                   |
| GPU per experiment                                                  |                       | 1                                         |                   |
| RAM per experiment                                                  |                       | 20 GB                                     |                   |
| Evaluation protocol                                                 |                       |                                           |                   |
| Total training (timesteps)                                          |                       | 2000000                                   |                   |
| Evaluation interval (timesteps)                                     |                       | 10000                                     |                   |
| Independent evaluation episodes                                     |                       | 32                                        |                   |
| Absolute metric (evaluation episodes, aggregation method)           |                       | 320, Mean with normal 95% CI              |                   |
| Local aggregation method                                            |                       | Mean                                      |                   |
| Global aggregation method                                           |                       | IQM with 95% stratified bootstrap CI      |                   |
| Metrics [Flatland]                                                  |                       | Return, Completion rate, Normalised score |                   |
| Exploration behaviour                                               |                       | Disabled                                  |                   |
| MARL Framework                                                      |                       | MAVA (0.1.2)                              |                   |
| Environment settings                                                |                       |                                           |                   |
| Flatland (3.0.15)                                                   | Training <sup>3</sup> | In sample evaluation                      |                   |
| Number of agents                                                    | 5                     | 5                                         |                   |
| Grid size (width x height)                                          | 25x25                 | 25x25                                     |                   |
| Maximum number of cities                                            | 4                     | 4                                         |                   |
| Maximum rails between cities                                        | 2                     | 2                                         |                   |
| Maximum rails in city                                               | 3                     | 3                                         |                   |
| Malfunctioning rate                                                 | 0                     | 0                                         |                   |
| Observation (type, depth)                                           | TreeObservation, 2    | TreeObservation, 2                        |                   |
| Shortest Path Predictor max depth                                   | 30                    | 30                                        |                   |
| Grid mode                                                           | True                  | True                                      |                   |
| Regenerate schedule on reset                                        | True                  | True                                      |                   |
| Regenerate rail on reset                                            | True                  | True                                      |                   |
| Seed                                                                | 0                     | 0                                         |                   |

## C.5 Results

All plots that are generated here are made using the tools provided by (Agarwal et al., 2021).

### C.5.1 Sample efficiency curves

The sample efficiency curves serve as a way to assess an algorithm's efficiency at improving on a particular metric during training time. For two algorithms that achieve the same final performance on some metric, the algorithm that does so with less training steps could therefore be considered to be more sample efficient. We compute the sample efficiency curves by making use of the normalized mean return at each evaluation interval as well as the mean completion rate achieved at each evaluation interval.

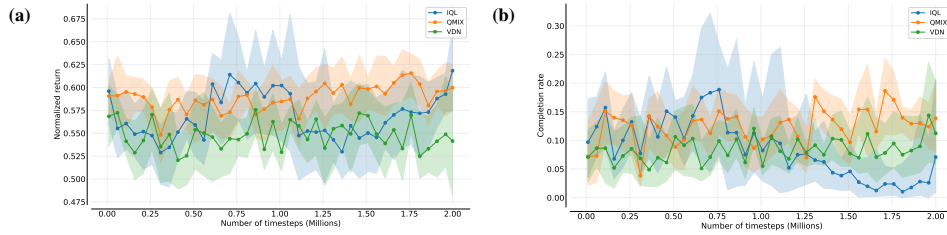

Figure 12: *Sample efficiency curves for experiments. (a) Normalized return. (b) Completion rate.*

From Figure 12 it can be noted that no particular algorithm is more efficient than any other algorithm and that all algorithms achieve relatively similar final performance. From Figure 12 (a) it can be noted that IQL and QMIX do reach a slightly higher final mean return than VDN.

### C.5.2 Aggregate score performance

All aggregated scores are done using the aggregation functions as shown in Figure 13. One aggregation function to note is the *Optimality Gap* which may be thought of as the how far an algorithm is from optimal performance at a given task. For this reason, a lower score is considered to be desirable. The confidence intervals shown alongside the point estimates (black bars) are the 95% stratified bootstrap confidence intervals.

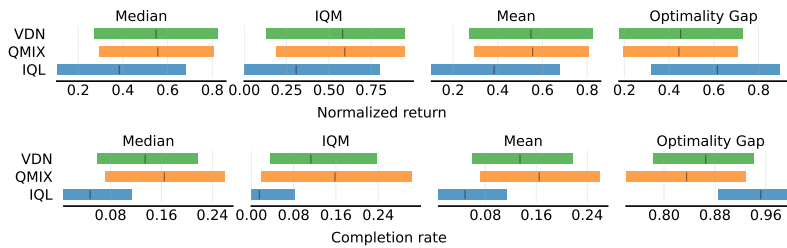

Figure 13: *Per task performance on a  $25 \times 25$  flatland grid. (Top) Normalized return. (Bottom) Completion rate.*

One can note from the top and bottom figure in Figure 13 that there is large variance in algorithm performance for both metrics used and it is hard to distinguish which algorithm has superior performance, particularly between VDN and QMIX. A clear outlier is IQL which consistently performs worse, across all metrics, than VDN and QMIX.

<sup>3</sup>Using same generator config from [https://gitlab.aicrowd.com/flatland/neurips2020-flatland-baselines/-/blob/flatland-paper-baselines/envs/flatland/generator\\_configs/small\\_v0.yaml](https://gitlab.aicrowd.com/flatland/neurips2020-flatland-baselines/-/blob/flatland-paper-baselines/envs/flatland/generator_configs/small_v0.yaml)

### C.5.3 Performance profiles

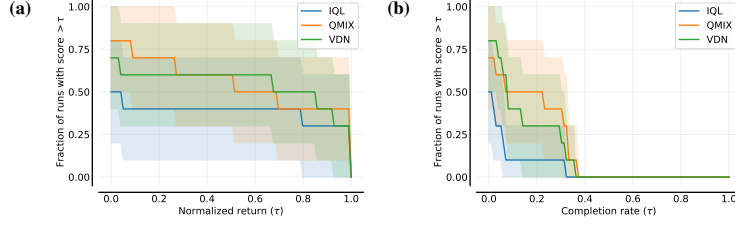

Figure 14: *Performance profiles for experiments. (a) Normalized return. (b) Completion rate.*

From Figure 14 it can be noted that the performance profiles paint a similar picture to the sample efficiency curves and the aggregated algorithm scores. IQL is consistently outperformed by VDN and QMIX. The performance profiles also clearly illustrate that no algorithm achieves a particularly high completion rate, highlighting the poor overall performance of all algorithms on the environment task.

### C.5.4 Probability of improvement

Probability of improvement plots should be interpreted as the probability that an algorithm X has superior performance than algorithm Y with a low score indicating that algorithm Y is likely to be better than algorithm X and vice versa for a high score.

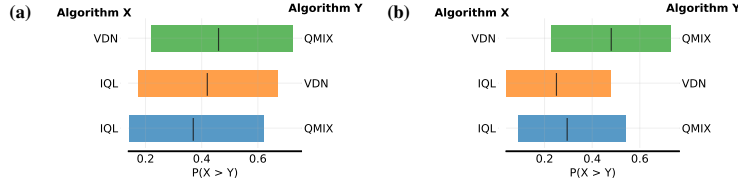

Figure 15: *Performance profiles for experiments. (a) Normalized return. (b) Completion rate.*

From Figure 15 one can note again that IQL is outperformed by VDN and QMIX using both metrics considered. It can also be noted again, that the performance of VDN and QMIX are relatively similar.

### C.5.5 Tabular Results

We report the IQM aggregated over the task for all algorithms with the 95% stratified bootstrap CI as well as the mean absolute performance of all algorithms on the task with the 95% CI. These scores collectively, as well as the sample efficiency curves sketch a full picture of the performance for a given algorithm. One can, at a glance, see the performance that the best policy for a particular algorithm is able to achieve from the tabular results, but one can also get a clear sense of the robustness of a particular algorithm by considering the sample efficiency curves. This makes for transparent result reporting.

The tabular results once again confirm all previous results in that IQL has inferior performance on the task when compared to its value factorisation counterparts and that VDN and QMIX obtain very similar performance. Due to the larger confidence intervals however, no clear conclusions can be drawn since the performance of all algorithms overlap when taking the CIs into account. One can also notice from Tables 8 & 9 that the absolute metric and IQM scores are very similar. The reason from this is because we only consider a single task in our environment. The true power of the tools that were used will be better illustrated when multiple tasks are considered.

### C.5.6 Overall findings

Due to the large variance in algorithm performance, we cannot draw any strong conclusions regarding algorithm performance from these experiments, but we have been able to illustrate the use of our guideline and how it gives a full overview of both the absolute and overall performance of a set

Table 8: IQM of absolute metrics for experiments with 95% Stratified Bootstrap CIs

| Algorithm | Normalized Returns   | Completion Rate      |
|-----------|----------------------|----------------------|
| IQL       | 0.307 (0.0, 0.799)   | 0.015 (0.0, 0.083)   |
| QMIX      | 0.593 (0.189, 0.949) | 0.158 (0.019, 0.304) |
| VDN       | 0.581 (0.131, 0.949) | 0.113 (0.035, 0.236) |

Table 9: Mean per task absolute metrics with 95% CIs

| Algorithm | Normalized Returns   | Completion Rate      |
|-----------|----------------------|----------------------|
| IQL       | 0.384 (0.08, 0.688)  | 0.048 (0.00, 0.109)  |
| QMIX      | 0.556 (0.284, 0.828) | 0.164 (0.066, 0.263) |
| VDN       | 0.548 (0.254, 0.842) | 0.134 (0.05, 0.218)  |

of algorithms on a particular task. We will continually update our demonstration by adding more flatland tasks, tuning algorithms and, ultimately, adding more environments to this experiment.

## References

- S. Sukhbaatar, a. szlam, and R. Fergus, “Learning multiagent communication with backpropagation,” in *Advances in Neural Information Processing Systems*, D. Lee, M. Sugiyama, U. Luxburg, I. Guyon, and R. Garnett, Eds., vol. 29. Curran Associates, Inc., 2016. [Online]. Available: <https://proceedings.neurips.cc/paper/2016/file/55b1927fdafef39c48e5b73b5d61ea60-Paper.pdf>
- J. Foerster, I. A. Assael, N. de Freitas, and S. Whiteson, “Learning to communicate with deep multi-agent reinforcement learning,” in *Advances in Neural Information Processing Systems*, D. Lee, M. Sugiyama, U. Luxburg, I. Guyon, and R. Garnett, Eds., vol. 29. Curran Associates, Inc., 2016. [Online]. Available: <https://proceedings.neurips.cc/paper/2016/file/c7635bfd99248a2cdef8249ef7bfef4-Paper.pdf>
- S. Omidshafiei, J. Pazis, C. Amato, J. P. How, and J. Vian, “Deep decentralized multi-task multi-agent reinforcement learning under partial observability,” in *ICML*, 2017, pp. 2681–2690. [Online]. Available: <http://proceedings.mlr.press/v70/omidshafiei17a.html>
- R. Lowe, Y. Wu, A. Tamar, J. Harb, P. Abbeel, and I. Mor-datch, “Multi-agent actor-critic for mixed cooperative-competitive environments,” in *NIPS*, 2017, pp. 6382–6393. [Online]. Available: <http://papers.nips.cc/paper/7217-multi-agent-actor-critic-for-mixed-cooperative-competitive-environments>
- J. Foerster, N. Nardelli, G. Farquhar, T. Afouras, P. H. S. Torr, P. Kohli, and S. Whiteson, “Stabilising experience replay for deep multi-agent reinforcement learning,” in *Proceedings of the 34th International Conference on Machine Learning*, ser. Proceedings of Machine Learning Research, D. Precup and Y. W. Teh, Eds., vol. 70. PMLR, 06–11 Aug 2017, pp. 1146–1155. [Online]. Available: <https://proceedings.mlr.press/v70/foerster17b.html>
- E. Wei, D. Wicke, D. Freelan, and S. Luke, “Multiagent soft q-learning,” in *2018 AAAI Spring Symposia, Stanford University, Palo Alto, California, USA, March 26-28, 2018*. AAAI Press, 2018. [Online]. Available: <https://aaai.org/ocs/index.php/SSS/SSS18/paper/view/17508>
- J. N. Foerster, G. Farquhar, T. Afouras, N. Nardelli, and S. Whiteson, “Counterfactual multi-agent policy gradients,” in *AAAI*. AAAI Press, 2018, pp. 2974–2982.
- P. Sunehag, G. Lever, A. Gruslys, W. M. Czarnecki, V. F. Zambaldi, M. Jaderberg, M. Lanctot, N. Sonnerat, J. Z. Leibo, K. Tuyls, and T. Graepel, “Value-decomposition networks for cooperative multi-agent learning based on team reward,” in *Proceedings of the 17th International Conference on Autonomous Agents and MultiAgent Systems, AAMAS 2018, Stockholm, Sweden, July 10-15, 2018*, E. André, S. Koenig, M. Dastani, and G. Sukthankar, Eds. International Foundation for Autonomous Agents and Multiagent Systems Richland, SC, USA / ACM, 2018, pp. 2085–2087. [Online]. Available: <http://dl.acm.org/citation.cfm?id=3238080>
- T. Rashid, M. Samvelyan, C. Schroeder, G. Farquhar, J. Foerster, and S. Whiteson, “QMIX: Monotonic value function factorisation for deep multi-agent reinforcement learning,” in *Proceedings of the 35th International Conference on Machine Learning*, ser. Proceedings of Machine Learning Research, J. Dy and A. Krause, Eds., vol. 80. PMLR, 10–15 Jul 2018, pp. 4295–4304. [Online]. Available: <https://proceedings.mlr.press/v80/rashid18a.html>
- A. Singh, T. Jain, and S. Sukhbaatar, “Learning when to communicate at scale in multiagent cooperative and competitive tasks,” in *International Conference on Learning Representations*, 2019. [Online]. Available: <https://openreview.net/forum?id=rye7knCqK7>
- S. Iqbal and F. Sha, “Actor-attention-critic for multi-agent reinforcement learning,” in *Proceedings of the 36th International Conference on Machine Learning*, ser. Proceedings of Machine Learning Research, K. Chaudhuri and R. Salakhutdinov, Eds., vol. 97. PMLR, 09–15 Jun 2019, pp. 2961–2970. [Online]. Available: <https://proceedings.mlr.press/v97/iqbal19a.html>
- S. Q. Zhang, Q. Zhang, and J. Lin, “Efficient communication in multi-agent reinforcement learning via variance based control,” in *Advances in Neural Information Processing Systems*, H. Wallach, H. Larochelle, A. Beygelzimer, F. d’Alché-Buc, E. Fox, and R. Garnett, Eds., vol. 32. Curran Associates, Inc., 2019. [Online]. Available: <https://proceedings.neurips.cc/paper/2019/file/14cfdb59b5bda1fc245aadae15b1984a-Paper.pdf>

- A. Malysheva, D. Kudenko, and A. Shpilman, “Magnet: Multi-agent graph network for deep multi-agent reinforcement learning,” in *2019 XVI International Symposium "Problems of Redundancy in Information and Control Systems" (REDUNDANCY)*, 2019, pp. 171–176.
- H. Mao, Z. Zhang, Z. Xiao, and Z. Gong, “Modelling the dynamic joint policy of teammates with attention multi-agent DDPG,” in *AAMAS*. International Foundation for Autonomous Agents and Multiagent Systems, 2019, pp. 1108–1116.
- M. Samvelyan, T. Rashid, C. S. de Witt, G. Farquhar, N. Nardelli, T. G. J. Rudner, C.-M. Hung, P. H. S. Torr, J. N. Foerster, and S. Whiteson, “The starcraft multi-agent challenge,” in *AAMAS*, 2019, pp. 2186–2188. [Online]. Available: <http://dl.acm.org/citation.cfm?id=3332052>
- N. Jaques, A. Lazaridou, E. Hughes, C. Gulcehre, P. Ortega, D. Strouse, J. Z. Leibo, and N. De Freitas, “Social influence as intrinsic motivation for multi-agent deep reinforcement learning,” in *Proceedings of the 36th International Conference on Machine Learning*, ser. Proceedings of Machine Learning Research, K. Chaudhuri and R. Salakhutdinov, Eds., vol. 97. PMLR, 09–15 Jun 2019, pp. 3040–3049. [Online]. Available: <https://proceedings.mlr.press/v97/jaques19a.html>
- Y. Du, L. Han, M. Fang, J. Liu, T. Dai, and D. Tao, “Liir: Learning individual intrinsic reward in multi-agent reinforcement learning,” in *Advances in Neural Information Processing Systems*, H. Wallach, H. Larochelle, A. Beygelzimer, F. d’Alché-Buc, E. Fox, and R. Garnett, Eds., vol. 32. Curran Associates, Inc., 2019. [Online]. Available: <https://proceedings.neurips.cc/paper/2019/file/07a9d3fed4c5ea6b17e80258dee231fa-Paper.pdf>
- A. Mahajan, T. Rashid, M. Samvelyan, and S. Whiteson, “Maven: Multi-agent variational exploration,” in *Advances in Neural Information Processing Systems*, H. Wallach, H. Larochelle, A. Beygelzimer, F. d’Alché-Buc, E. Fox, and R. Garnett, Eds., vol. 32. Curran Associates, Inc., 2019. [Online]. Available: <https://proceedings.neurips.cc/paper/2019/file/f816dc0acface7498e10496222e9db10-Paper.pdf>
- C. Schroeder de Witt, J. Foerster, G. Farquhar, P. Torr, W. Boehmer, and S. Whiteson, “Multi-agent common knowledge reinforcement learning,” in *Advances in Neural Information Processing Systems*, H. Wallach, H. Larochelle, A. Beygelzimer, F. d’Alché-Buc, E. Fox, and R. Garnett, Eds., vol. 32. Curran Associates, Inc., 2019. [Online]. Available: <https://proceedings.neurips.cc/paper/2019/file/f968fdc88852a4a3a27a81fe3f57bfc5-Paper.pdf>
- N. Carion, N. Usunier, G. Synnaeve, and A. Lazaric, “A structured prediction approach for generalization in cooperative multi-agent reinforcement learning,” in *Advances in Neural Information Processing Systems*, H. Wallach, H. Larochelle, A. Beygelzimer, F. d’Alché-Buc, E. Fox, and R. Garnett, Eds., vol. 32. Curran Associates, Inc., 2019. [Online]. Available: <https://proceedings.neurips.cc/paper/2019/file/3c3c139bd8467c1587a41081ad78045e-Paper.pdf>
- A. Das, T. Gervet, J. Romoff, D. Batra, D. Parikh, M. Rabbat, and J. Pineau, “TarMAC: Targeted multi-agent communication,” in *Proceedings of the 36th International Conference on Machine Learning*, ser. Proceedings of Machine Learning Research, K. Chaudhuri and R. Salakhutdinov, Eds., vol. 97. PMLR, 09–15 Jun 2019, pp. 1538–1546. [Online]. Available: <https://proceedings.mlr.press/v97/das19a.html>
- K. Son, D. Kim, W. J. Kang, D. E. Hostallero, and Y. Yi, “QTRAN: Learning to factorize with transformation for cooperative multi-agent reinforcement learning,” in *Proceedings of the 36th International Conference on Machine Learning*, ser. Proceedings of Machine Learning Research, K. Chaudhuri and R. Salakhutdinov, Eds., vol. 97. PMLR, 09–15 Jun 2019, pp. 5887–5896. [Online]. Available: <https://proceedings.mlr.press/v97/son19a.html>
- T. Wang, J. Wang, Y. Wu, and C. Zhang, “Influence-based multi-agent exploration,” in *International Conference on Learning Representations*, 2020. [Online]. Available: <https://openreview.net/forum?id=BJgy96EYvr>
- Y. Liu, W. Wang, Y. Hu, J. Hao, X. Chen, and Y. Gao, “Multi-agent game abstraction via graph attention neural network,” *Proceedings of the AAAI Conference on Artificial Intelligence*, vol. 34, no. 05, pp. 7211–7218, Apr. 2020. [Online]. Available: <https://ojs.aaai.org/index.php/AAAI/article/view/6211>

- J. Ma and F. Wu, “Feudal multi-agent deep reinforcement learning for traffic signal control,” in *Proceedings of the 19th International Conference on Autonomous Agents and MultiAgent Systems*, ser. AAMAS ’20. Richland, SC: International Foundation for Autonomous Agents and Multiagent Systems, 2020, p. 816–824.
- I.-J. Liu, R. A. Yeh, and A. G. Schwing, “Pic: Permutation invariant critic for multi-agent deep reinforcement learning,” in *Proceedings of the Conference on Robot Learning*, ser. Proceedings of Machine Learning Research, L. P. Kaelbling, D. Kragic, and K. Sugiura, Eds., vol. 100. PMLR, 30 Oct–01 Nov 2020, pp. 590–602. [Online]. Available: <https://proceedings.mlr.press/v100/liu20a.html>
- W. Wang, T. Yang, Y. Liu, J. Hao, X. Hao, Y. Hu, Y. Chen, C. Fan, and Y. Gao, “Action semantics network: Considering the effects of actions in multiagent systems,” in *ICLR*, 2020. [Online]. Available: <https://openreview.net/forum?id=ryg48p4tPH>
- S. Q. Zhang, Q. Zhang, and J. Lin, “Succinct and robust multi-agent communication with temporal message control,” in *Advances in Neural Information Processing Systems*, H. Larochelle, M. Ranzato, R. Hadsell, M. Balcan, and H. Lin, Eds., vol. 33. Curran Associates, Inc., 2020, pp. 17 271–17 282. [Online]. Available: <https://proceedings.neurips.cc/paper/2020/file/c82b013313066e0702d58dc70db033ca-Paper.pdf>
- J. Xu, F. Zhong, and Y. Wang, “Learning multi-agent coordination for enhancing target coverage in directional sensor networks,” in *Advances in Neural Information Processing Systems*, H. Larochelle, M. Ranzato, R. Hadsell, M. Balcan, and H. Lin, Eds., vol. 33. Curran Associates, Inc., 2020, pp. 10 053–10 064. [Online]. Available: <https://proceedings.neurips.cc/paper/2020/file/7250eb93b3c18cc9daa29cf58af7a004-Paper.pdf>
- T. Wang, J. Wang, C. Zheng, and C. Zhang, “Learning nearly decomposable value functions via communication minimization,” in *International Conference on Learning Representations*, 2020. [Online]. Available: <https://openreview.net/forum?id=HJx-3grYDB>
- J. Roy, P. Barde, F. Harvey, D. Nowrouzezahrai, and C. Pal, “Promoting coordination through policy regularization in multi-agent deep reinforcement learning,” in *Advances in Neural Information Processing Systems*, H. Larochelle, M. Ranzato, R. Hadsell, M. Balcan, and H. Lin, Eds., vol. 33. Curran Associates, Inc., 2020, pp. 15 774–15 785. [Online]. Available: <https://proceedings.neurips.cc/paper/2020/file/b628386c9b92481fab68bf284bd6a64-Paper.pdf>
- J. Wang, Y. Zhang, T.-K. Kim, and Y. Gu, “Shapley q-value: A local reward approach to solve global reward games,” in *AAAI*, 2020, pp. 7285–7292. [Online]. Available: <https://aaai.org/ojs/index.php/AAAI/article/view/6220>
- W. Boehmer, V. Kurin, and S. Whiteson, “Deep coordination graphs,” in *Proceedings of the 37th International Conference on Machine Learning*, ser. Proceedings of Machine Learning Research, H. D. III and A. Singh, Eds., vol. 119. PMLR, 13–18 Jul 2020, pp. 980–991. [Online]. Available: <https://proceedings.mlr.press/v119/boehmer20a.html>
- Q. Long, Z. Zhou, A. Gupta, F. Fang, Y. Wu, and X. Wang, “Evolutionary population curriculum for scaling multi-agent reinforcement learning,” in *ICLR*, 2020.
- F. Christianos, L. Schäfer, and S. Albrecht, “Shared experience actor-critic for multi-agent reinforcement learning,” in *Advances in Neural Information Processing Systems*, H. Larochelle, M. Ranzato, R. Hadsell, M. Balcan, and H. Lin, Eds., vol. 33. Curran Associates, Inc., 2020, pp. 10 707–10 717. [Online]. Available: <https://proceedings.neurips.cc/paper/2020/file/7967cc8e3ab559e68cc944c44b1cf3e8-Paper.pdf>
- C. Wen, X. Yao, Y. Wang, and X. Tan, “Smix( $\lambda$ ): Enhancing centralized value functions for cooperative multi-agent reinforcement learning,” in *The Thirty-Fourth AAAI Conference on Artificial Intelligence, AAAI 2020, The Thirty-Second Innovative Applications of Artificial Intelligence Conference, IAAI 2020, The Tenth AAAI Symposium on Educational Advances in Artificial Intelligence, EAAI 2020, New York, NY, USA, February 7-12, 2020*. AAAI Press, 2020, pp. 7301–7308. [Online]. Available: <https://ojs.aaai.org/index.php/AAAI/article/view/6223>

- A. Agarwal, S. Kumar, K. P. Sycara, and M. Lewis, “Learning transferable cooperative behavior in multi-agent teams,” in *AAMAS. International Foundation for Autonomous Agents and Multiagent Systems*, 2020, pp. 1741–1743.
- G. Papoudakis, F. Christianos, L. Schäfer, and S. V. Albrecht, “Comparative evaluation of multi-agent deep reinforcement learning algorithms,” vol. abs/2006.07869, 2020. [Online]. Available: <https://arxiv.org/abs/2006.07869>
- Z. Ding, T. Huang, and Z. Lu, “Learning individually inferred communication for multi-agent cooperation,” in *Advances in Neural Information Processing Systems*, H. Larochelle, M. Ranzato, R. Hadsell, M. Balcan, and H. Lin, Eds., vol. 33. Curran Associates, Inc., 2020, pp. 22 069–22 079. [Online]. Available: <https://proceedings.neurips.cc/paper/2020/file/fb2fcd534b0ff3bbcd73cc51df620323-Paper.pdf>
- H. Hu and J. N. Foerster, “Simplified action decoder for deep multi-agent reinforcement learning,” in *International Conference on Learning Representations*, 2020. [Online]. Available: <https://openreview.net/forum?id=B1xm3RVtwB>
- M. Zhou, Z. Liu, P. Sui, Y. Li, and Y. Y. Chung, “Learning implicit credit assignment for cooperative multi-agent reinforcement learning,” in *Advances in Neural Information Processing Systems*, H. Larochelle, M. Ranzato, R. Hadsell, M. Balcan, and H. Lin, Eds., vol. 33. Curran Associates, Inc., 2020, pp. 11 853–11 864. [Online]. Available: <https://proceedings.neurips.cc/paper/2020/file/8977ecbb8cb82d77fb091c7a7f186163-Paper.pdf>
- J. Chen, Y. Zhang, Y. Xu, H. Ma, H. Yang, J. Song, Y. Wang, and Y. Wu, “Variational automatic curriculum learning for sparse-reward cooperative multi-agent problems,” in *Advances in Neural Information Processing Systems*, M. Ranzato, A. Beygelzimer, Y. Dauphin, P. Liang, and J. W. Vaughan, Eds., vol. 34. Curran Associates, Inc., 2021, pp. 9681–9693. [Online]. Available: <https://proceedings.neurips.cc/paper/2021/file/503e7dbbd6217b9a591f3322f39b5a6c-Paper.pdf>
- M. Chen, Y. Li, E. Wang, Z. Yang, Z. Wang, and T. Zhao, “Pessimism meets invariance: Provably efficient offline mean-field multi-agent rl,” in *Advances in Neural Information Processing Systems*, M. Ranzato, A. Beygelzimer, Y. Dauphin, P. Liang, and J. W. Vaughan, Eds., vol. 34. Curran Associates, Inc., 2021, pp. 17 913–17 926. [Online]. Available: <https://proceedings.neurips.cc/paper/2021/file/9559fc73b13fa721a816958488a5b449-Paper.pdf>
- S. Li, J. K. Gupta, P. Morales, R. Allen, and M. J. Kochenderfer, “Deep implicit coordination graphs for multi-agent reinforcement learning,” in *Proceedings of the 20th International Conference on Autonomous Agents and MultiAgent Systems*, ser. AAMAS ’21. Richland, SC: International Foundation for Autonomous Agents and Multiagent Systems, 2021, p. 764–772.
- W.-F. Sun, C.-K. Lee, and C.-Y. Lee, “Dfmc framework: Factorizing the value function via quantile mixture for multi-agent distributional q-learning,” in *Proceedings of the 38th International Conference on Machine Learning*, ser. Proceedings of Machine Learning Research, M. Meila and T. Zhang, Eds., vol. 139. PMLR, 18–24 Jul 2021, pp. 9945–9954. [Online]. Available: <https://proceedings.mlr.press/v139/sun21c.html>
- F. Christianos, G. Papoudakis, M. A. Rahman, and S. V. Albrecht, “Scaling multi-agent reinforcement learning with selective parameter sharing,” in *Proceedings of the 38th International Conference on Machine Learning*, ser. Proceedings of Machine Learning Research, M. Meila and T. Zhang, Eds., vol. 139. PMLR, 18–24 Jul 2021, pp. 1989–1998. [Online]. Available: <https://proceedings.mlr.press/v139/christianos21a.html>
- J. Wang, Z. Ren, B. Han, J. Ye, and C. Zhang, “Towards understanding cooperative multi-agent q-learning with value factorization,” in *Advances in Neural Information Processing Systems*, M. Ranzato, A. Beygelzimer, Y. Dauphin, P. Liang, and J. W. Vaughan, Eds., vol. 34. Curran Associates, Inc., 2021, pp. 29 142–29 155. [Online]. Available: <https://proceedings.neurips.cc/paper/2021/file/f3f1fa1e4348bfbebddee8c80a04c3b9-Paper.pdf>
- K. M. Lee, S. G. Subramanian, and M. Crowley, “Investigation of independent reinforcement learning algorithms in multi-agent environments,” in *Deep RL Workshop NeurIPS 2021*, 2021. [Online]. Available: <https://openreview.net/forum?id=8MkKGZ2AlmJ>

- L. Chenghao, T. Wang, C. Wu, Q. Zhao, J. Yang, and C. Zhang, “Celebrating diversity in shared multi-agent reinforcement learning,” in *Advances in Neural Information Processing Systems*, M. Ranzato, A. Beygelzimer, Y. Dauphin, P. Liang, and J. W. Vaughan, Eds., vol. 34. Curran Associates, Inc., 2021, pp. 3991–4002. [Online]. Available: <https://proceedings.neurips.cc/paper/2021/file/20aee3a5f4643755a79ee5f6a73050ac-Paper.pdf>
- T. Wang, T. Gupta, A. Mahajan, B. Peng, S. Whiteson, and C. Zhang, “Rode: Learning roles to decompose multi-agent tasks,” in *ICLR*, 2021. [Online]. Available: <https://openreview.net/forum?id=TTUVg6vkNjK>
- Y. Xiao, X. Lyu, and C. Amato, “Local advantage actor-critic for robust multi-agent deep reinforcement learning,” in *MRS*. IEEE, 2021, pp. 155–163.
- Z. Xu, D. Li, Y. Bai, and G. Fan, “MMD-MIX: value function factorisation with maximum mean discrepancy for cooperative multi-agent reinforcement learning,” in *International Joint Conference on Neural Networks, IJCNN 2021, Shenzhen, China, July 18-22, 2021*. IEEE, 2021, pp. 1–7. [Online]. Available: <https://doi.org/10.1109/IJCNN52387.2021.9533636>
- J. Jiang and Z. Lu, “The emergence of individuality,” in *Proceedings of the 38th International Conference on Machine Learning*, ser. Proceedings of Machine Learning Research, M. Meila and T. Zhang, Eds., vol. 139. PMLR, 18–24 Jul 2021, pp. 4992–5001. [Online]. Available: <https://proceedings.mlr.press/v139/jiang21g.html>
- P. Leroy, D. Ernst, P. Geurts, G. Louppe, J. Pisane, and M. Sabatelli, “QVMix and QVMix-Max: Extending the Deep Quality-Value Family of Algorithms to Cooperative Multi-Agent Reinforcement Learning,” in *Proceedings of the AAAI-21 Workshop on Reinforcement Learning in Games*, 2021. [Online]. Available: <https://arxiv.org/abs/2012.12062>
- T. Rashid, G. Farquhar, B. Peng, and S. Whiteson, “Weighted qmix: Expanding monotonic value function factorisation for deep multi-agent reinforcement learning.” *NeurIPS*, 2021.
- J. Su, S. C. Adams, and P. A. Beling, “Value-decomposition multi-agent actor-critics,” in *Thirty-Fifth AAAI Conference on Artificial Intelligence, AAAI 2021, Thirty-Third Conference on Innovative Applications of Artificial Intelligence, IAAI 2021, The Eleventh Symposium on Educational Advances in Artificial Intelligence, EAAI 2021, Virtual Event, February 2-9, 2021*. AAAI Press, 2021, pp. 11 352–11 360. [Online]. Available: <https://ojs.aaai.org/index.php/AAAI/article/view/17353>
- L. Pan, T. Rashid, B. Peng, L. Huang, and S. Whiteson, “Regularized softmax deep multi-agent q-learning,” in *Advances in Neural Information Processing Systems*, M. Ranzato, A. Beygelzimer, Y. Dauphin, P. Liang, and J. W. Vaughan, Eds., vol. 34. Curran Associates, Inc., 2021, pp. 1365–1377. [Online]. Available: <https://proceedings.neurips.cc/paper/2021/file/0a113ef6b61820daa5611c870ed8d5ee-Paper.pdf>
- I.-J. Liu, U. Jain, R. A. Yeh, and A. Schwing, “Cooperative exploration for multi-agent deep reinforcement learning,” in *Proceedings of the 38th International Conference on Machine Learning*, ser. Proceedings of Machine Learning Research, M. Meila and T. Zhang, Eds., vol. 139. PMLR, 18–24 Jul 2021, pp. 6826–6836. [Online]. Available: <https://proceedings.mlr.press/v139/liu21j.html>
- I. Saeed, A. C. Cullen, S. M. Erfani, and T. Alpcan, “Domain-aware multiagent reinforcement learning in navigation,” in *International Joint Conference on Neural Networks, IJCNN 2021, Shenzhen, China, July 18-22, 2021*. IEEE, 2021, pp. 1–8. [Online]. Available: <https://doi.org/10.1109/IJCNN52387.2021.9533975>
- B. Guresti and N. K. Ure, “Evaluating generalization and transfer capacity of multi-agent reinforcement learning across variable number of agents,” *CoRR*, vol. abs/2111.14177, 2021. [Online]. Available: <https://arxiv.org/abs/2111.14177>
- L. Zheng, J. Chen, J. Wang, J. He, Y. Hu, Y. Chen, C. Fan, Y. Gao, and C. Zhang, “Episodic multi-agent reinforcement learning with curiosity-driven exploration,” in *Advances in Neural Information Processing Systems*, M. Ranzato, A. Beygelzimer, Y. Dauphin, P. Liang, and J. W. Vaughan, Eds., vol. 34. Curran Associates, Inc., 2021, pp. 3757–3769. [Online]. Available: <https://proceedings.neurips.cc/paper/2021/file/1e8ca836c962598551882e689265c1c5-Paper.pdf>

- G. Papoudakis, F. Christianos, L. Schäfer, and S. V. Albrecht, “Benchmarking multi-agent deep reinforcement learning algorithms in cooperative tasks,” in *Thirty-fifth Conference on Neural Information Processing Systems Datasets and Benchmarks Track (Round 1)*, 2021. [Online]. Available: <https://openreview.net/forum?id=clrPX-Sn5n>
- E. Marchesini and A. Farinelli, “Centralizing state-values in dueling networks for multi-robot reinforcement learning mapless navigation,” in *IEEE/RSJ International Conference on Intelligent Robots and Systems, IROS 2021, Prague, Czech Republic, September 27 - Oct. 1, 2021*. IEEE, 2021, pp. 4583–4588. [Online]. Available: <https://doi.org/10.1109/IROS51168.2021.9636349>
- J. Wang, Z. Ren, T. Liu, Y. Yu, and C. Zhang, “{QPLEX}: Duplex dueling multi-agent q-learning,” in *International Conference on Learning Representations*, 2021. [Online]. Available: <https://openreview.net/forum?id=Rcmk0xxIQV>
- J. G. Kuba, M. Wen, L. Meng, s. gu, H. Zhang, D. Mguni, J. Wang, and Y. Yang, “Settling the variance of multi-agent policy gradients,” in *Advances in Neural Information Processing Systems*, M. Ranzato, A. Beygelzimer, Y. Dauphin, P. Liang, and J. W. Vaughan, Eds., vol. 34. Curran Associates, Inc., 2021, pp. 13 458–13 470. [Online]. Available: <https://proceedings.neurips.cc/paper/2021/file/6fe6a8a6e6cb710584efc4af0c34ce50-Paper.pdf>
- B. Peng, T. Rashid, C. Schroeder de Witt, P.-A. Kamienny, P. Torr, W. Boehmer, and S. Whiteson, “Facmac: Factored multi-agent centralised policy gradients,” in *Advances in Neural Information Processing Systems*, M. Ranzato, A. Beygelzimer, Y. Dauphin, P. Liang, and J. W. Vaughan, Eds., vol. 34. Curran Associates, Inc., 2021, pp. 12 208–12 221. [Online]. Available: <https://proceedings.neurips.cc/paper/2021/file/65b9eea6e1cc6bb9f0cd2a47751a186f-Paper.pdf>
- L. Yuan, J. Wang, F. Zhang, C. Wang, Z. Zhang, Y. Yu, and C. Zhang, “Multi-agent incentive communication via decentralized teammate modeling,” 2022.
- D. H. Mguni, T. Jafferjee, J. Wang, N. Perez-Nieves, O. Slumbers, F. Tong, Y. Li, J. Zhu, Y. Yang, and J. Wang, “LIGS: Learnable intrinsic-reward generation selection for multi-agent learning,” in *International Conference on Learning Representations*, 2022. [Online]. Available: <https://openreview.net/forum?id=CpTuR2ECuW>
- Y. Wang, fangwei zhong, J. Xu, and Y. Wang, “Tom2c: Target-oriented multi-agent communication and cooperation with theory of mind,” in *International Conference on Learning Representations*, 2022. [Online]. Available: <https://openreview.net/forum?id=2t7CkQXNpuq>
- J. G. Kuba, R. Chen, M. Wen, Y. Wen, F. Sun, J. Wang, and Y. Yang, “Trust region policy optimisation in multi-agent reinforcement learning,” in *International Conference on Learning Representations*, 2022. [Online]. Available: <https://openreview.net/forum?id=EcGGFkNTxdJ>
- S. A. Stavroulakis and B. Sengupta, “Reinforcement learning for location-aware warehouse scheduling,” in *ICLR 2022 Workshop on Generalizable Policy Learning in Physical World*, 2022. [Online]. Available: <https://openreview.net/forum?id=Bt-gaVaVJ-9>
- A. Castagna and I. Dusparic, “Multi-agent transfer learning in reinforcement learning-based ride-sharing systems,” in *Proceedings of the 14th International Conference on Agents and Artificial Intelligence, ICAART 2022, Volume 2, Online Streaming, February 3-5, 2022*, A. P. Rocha, L. Steels, and H. J. van den Herik, Eds. SCITEPRESS, 2022, pp. 120–130. [Online]. Available: <https://doi.org/10.5220/0010785200003116>
- M. Zawalski, B. Osinski, H. Michalewski, and P. Milos, “Off-policy correction for multi-agent reinforcement learning,” in *AAMAS. International Foundation for Autonomous Agents and Multiagent Systems (IFAAMAS)*, 2022, pp. 1774–1776.
- R. Avalos, M. Reymond, A. Nowé, and D. M. Roijers, “Local advantage networks for cooperative multi-agent reinforcement learning,” in *AAMAS. International Foundation for Autonomous Agents and Multiagent Systems (IFAAMAS)*, 2022, pp. 1524–1526.
- Y. X. Xueguang Lyu, “A deeper understanding of state-based critics in multi-agent reinforcement learning,” *Proceedings of the AAAI Conference on Artificial Intelligence*, 2022. [Online]. Available: <https://par.nsf.gov/biblio/10315765>

- V. Mnih, A. P. Badia, M. Mirza, A. Graves, T. P. Lillicrap, T. Harley, D. Silver, and K. Kavukcuoglu, "Asynchronous methods for deep reinforcement learning," 2016. [Online]. Available: <https://arxiv.org/abs/1602.01783>
- A. Tampuu, T. Matiisen, D. Kodelja, I. Kuzovkin, K. Korjus, J. Aru, J. Aru, and R. Vicente, "Multiagent cooperation and competition with deep reinforcement learning," *PLOS ONE*, vol. 12, 11 2015.
- C. Yu, A. Velu, E. Vinitzky, Y. Wang, A. Bayen, and Y. Wu, "The surprising effectiveness of ppo in cooperative, multi-agent games," 2021. [Online]. Available: <https://arxiv.org/abs/2103.01955>
- Y. J. Park, Y. J. Lee, and S. B. Kim, "Cooperative multi-agent reinforcement learning with approximate model learning," *IEEE Access*, vol. 8, pp. 125 389–125 400, 2020.
- J. Hu, S. Jiang, S. A. Harding, H. Wu, and S. wei Liao, "Rethinking the implementation tricks and monotonicity constraint in cooperative multi-agent reinforcement learning," 2021.
- T. P. Lillicrap, J. J. Hunt, A. Pritzel, N. Heess, T. Erez, Y. Tassa, D. Silver, and D. Wierstra, "Continuous control with deep reinforcement learning," *arXiv preprint arXiv:1509.02971*, 2015.
- R. Agarwal, M. Schwarzer, P. S. Castro, A. C. Courville, and M. Bellemare, "Deep reinforcement learning at the edge of the statistical precipice," *Advances in Neural Information Processing Systems*, vol. 34, 2021.
- E. G. R. Kirk, A. Zhang and T. Rocktäschel, "A survey of generalisation in deep reinforcement learning," *arXiv preprint arXiv:2111.09794*, 2021.
- S. Mohanty, E. Nygren, F. Laurent, M. Schneider, C. Scheller, N. Bhattacharya, J. Watson, A. Egli, C. Eichenberger, C. Baumberger *et al.*, "Flatland-rl: Multi-agent reinforcement learning on trains," *arXiv preprint arXiv:2012.05893*, 2020.
